# Supplementary material for: Exploring the influence of H-bonding and ligand constraints on thiolate ligated non-heme iron mediated dioxygen activation
Source: Royal Society of Chemistry journal article supplement (doi:10.1039/d4sc02787f), 2024-01-01
Supplement: d4sc02787f1.pdf [file d4sc02787f1.pdf]

## Supplemental Information for:

# Exploring the Influence of H-Bonding and Ligand Constraints on Thiolate Ligated Non-Heme Iron Mediated Dioxygen Activation

Maike N. Lundahl,<sup>a</sup> Maria B. Greiner,<sup>a</sup> Marc C. Piquette,<sup>b</sup> Paige M. Gannon,<sup>a</sup> Werner Kaminsky<sup>†a</sup> and Julie A. Kovacs<sup>\*a</sup>

<sup>a</sup>Department of Chemistry, University of Washington, Campus Box 351700 Seattle, WA 98195, USA.

<sup>b</sup>Department of Chemistry, Tufts University, 62 Talbot Avenue, Medford, Massachusetts 02155, United States

| <u>Experimental</u>                                                                                                                                                                                                                                                                                                                                                                                                                                                                                                                    | <u>Page</u> |
|----------------------------------------------------------------------------------------------------------------------------------------------------------------------------------------------------------------------------------------------------------------------------------------------------------------------------------------------------------------------------------------------------------------------------------------------------------------------------------------------------------------------------------------|-------------|
| General Methods.                                                                                                                                                                                                                                                                                                                                                                                                                                                                                                                       | S3          |
| Evans Method of [Fe <sup>II</sup> (S <sub>2</sub> <sup>Me2</sup> N <sub>3</sub> (Pr,Pr)) (1).                                                                                                                                                                                                                                                                                                                                                                                                                                          | S3          |
| Kinetic Measurements.                                                                                                                                                                                                                                                                                                                                                                                                                                                                                                                  | S3-S5       |
| Preparation of Saturated Dioxygen Solutions                                                                                                                                                                                                                                                                                                                                                                                                                                                                                            | S5          |
| Dilution of Dioxygen Solutions.                                                                                                                                                                                                                                                                                                                                                                                                                                                                                                        | S5-S6       |
| Preparation of Potassium Superoxide Solutions.                                                                                                                                                                                                                                                                                                                                                                                                                                                                                         | S6          |
| Computational Details.                                                                                                                                                                                                                                                                                                                                                                                                                                                                                                                 | S6-S7       |
| X-ray Crystallographic Structure Determination                                                                                                                                                                                                                                                                                                                                                                                                                                                                                         | S8          |
| Derivation of the Rate Expression                                                                                                                                                                                                                                                                                                                                                                                                                                                                                                      | S9-S10      |
| <u>Supplementary Figures</u>                                                                                                                                                                                                                                                                                                                                                                                                                                                                                                           |             |
| <b>Figure S1.</b> Kinetic trace at $\lambda = 523$ nm acquired $-40$ °C with [1] = 0.25 mM and [O <sub>2</sub> ] = 4.0 mM in THF (concentrations in the mixing cell are given). The experimental trace is shown in black; the pseudo-first order fit is shown in red; residuals in blue are appended to the bottom of the graph.                                                                                                                                                                                                       | S11         |
| <b>Figure S2.</b> Plot of observed rate constants ( $k_{\text{obs}}$ ) for the formation of Fe <sup>III</sup> -superoxo <b>2</b> versus [Fe <sup>II</sup> (S <sub>2</sub> <sup>Me2</sup> N <sub>3</sub> (Pr,Pr)) (1) concentration at $-40$ °C in THF. [O <sub>2</sub> ] after mixing = 3.95 mM                                                                                                                                                                                                                                        | S12         |
| <b>Figure S3.</b> Plot of observed rate constants ( $k_{\text{obs}}$ ) for the formation of Fe <sup>III</sup> -superoxo <b>2</b> versus the concentration of [Fe <sup>II</sup> (S <sub>2</sub> <sup>Me2</sup> N <sub>3</sub> (Pr,Pr)) (1) at $0$ °C in MeOH. [O <sub>2</sub> ] after mixing = 4.25 mM.                                                                                                                                                                                                                                 | S12         |
| <b>Figure S4.</b> The dissociation rate constant, $k_{\text{off}}$ , obtained from the y-intercept of the $k_{\text{obs}}$ vs [O <sub>2</sub> ] plots of Figure 3 (main text), does not correlate with temperature in THF. This, coupled with the $\sim$ zero intercept of Fig. 2 would be consistent with irreversible O <sub>2</sub> binding to <b>1</b> in this solvent.                                                                                                                                                            | S13         |
| <b>Figure S5.</b> Correlation between temperature and rate constants for O <sub>2</sub> release from superoxo <b>2</b> , $k_{\text{off}}$ , in MeOH. Dissociation rate constants, $k_{\text{off}}$ , were obtained from the y-intercept of the $k_{\text{obs}}$ vs [O <sub>2</sub> ] plots (Fig. 4 of main text).                                                                                                                                                                                                                      | S13         |
| <b>Figure S6.</b> Arrhenius plot for O <sub>2</sub> binding to <b>1</b> in MeOH, from which activation parameter $E_a = 32(2)$ kJ mol <sup>-1</sup> was obtained.                                                                                                                                                                                                                                                                                                                                                                      | S14         |
| <b>Figure S7.</b> Arrhenius plot for O <sub>2</sub> binding to <b>1</b> in THF, from which activation parameter $E_a = 21.4(8)$ kJ mol <sup>-1</sup> was obtained.                                                                                                                                                                                                                                                                                                                                                                     | S14         |
| <b>Figure S8.</b> Kinetic trace for superoxide (KO <sub>2</sub> ) binding to <b>3</b> monitored at $\lambda = 523$ nm with [1] = 0.1 mM and [KO <sub>2</sub> ] = 5.0 mM in THF at $-40$ °C under a constant ionic strength of 0.01 M with added Bu <sub>4</sub> NPF <sub>6</sub> (concentrations listed are after mixing in the stopped-flow cell). The experimental data points are shown in blue; the pseudo-first order fit to eqn (1) of the main text is shown in red; residuals in red are appended to the bottom of the graph . | S15         |
| <b>Figure S9.</b> Zero order dependence of $k_{\text{obs}}$ on Fe(III) concentration under pseudo first order conditions with excess KO <sub>2</sub> (5 mM). This would be consistent with 1 <sup>st</sup> order dependence on Fe(III) overall..                                                                                                                                                                                                                                                                                       | S16         |
| <b>Figure S10.</b> Arrhenius plot for superoxide (KO <sub>2</sub> solubilized with KryptoFix) binding to Fe(III)- <b>3</b> in THF.                                                                                                                                                                                                                                                                                                                                                                                                     | S17         |

|                                                                                                                                                                                                                                                                                                                                                                                                                                                                      |         |
|----------------------------------------------------------------------------------------------------------------------------------------------------------------------------------------------------------------------------------------------------------------------------------------------------------------------------------------------------------------------------------------------------------------------------------------------------------------------|---------|
| <b>Figure S11.</b> Arrhenius plot for O <sub>2</sub> release from superoxo <b>2</b> in MeOH, from which the activation parameter E <sub>a</sub> = 34(4) kJ mol <sup>-1</sup> was obtained.                                                                                                                                                                                                                                                                           | S17     |
| <b>Figure S12.</b> DFT optimized structure of [Fe <sup>II</sup> (S <sub>2</sub> <sup>Me2</sup> N <sub>3</sub> (Pr,Pr))•••H-OMe ( <b>1</b> ) containing a MeOH solvent molecule H-bonded to one of the thiolate sulfurs, S(2). Calculated MeO(1)-H•••S(2) distance is 2.211 Å (see Table S10).                                                                                                                                                                        | S18     |
| <b>Figure S13.</b> Electronic absorption spectrum of Fe <sup>III</sup> -superoxo <b>2</b> (0.25 mM) in THF vs MeOH.                                                                                                                                                                                                                                                                                                                                                  | S18     |
| <b>Figure S14.</b> Time-dependent DFT (TD-DFT) calculated electronic absorption spectrum for [Fe <sup>II</sup> (S <sub>2</sub> <sup>Me2</sup> N <sub>3</sub> (Pr,Pr)) ( <b>1</b> ) in THF solvent molecule.                                                                                                                                                                                                                                                          | S19     |
| <b>Figure S15.</b> Time-dependent DFT (TD-DFT) calculated electronic absorption spectrum for [Fe <sup>II</sup> (S <sub>2</sub> <sup>Me2</sup> N <sub>3</sub> (Pr,Pr))•••H-OMe ( <b>1</b> ) containing a MeOH solvent molecule H-bonded to one of the thiolate sulfurs, showing that H-bonding causes the S→Fe charge transfer band to blue shift relative to that shown in Fig. S14.                                                                                 | S20     |
| <b>Figure S16.</b> Chemdraw depiction of the ligands in Table 2 of the main text.                                                                                                                                                                                                                                                                                                                                                                                    | S21     |
| <b>Supplementary Tables</b>                                                                                                                                                                                                                                                                                                                                                                                                                                          |         |
| <b>Table S1.</b> Temperature-dependent pseudo 1 <sup>st</sup> order rate constants for the reaction between <b>1</b> ([ <b>1</b> ] <sub>0</sub> = 0.25 mM) and O <sub>2</sub> in THF. All reported concentrations are after mixing in the stopped-flow cell.                                                                                                                                                                                                         | S22     |
| <b>Table S2.</b> Observed rate constants for the reaction between <b>1</b> ([ <b>1</b> ] <sub>0</sub> = 0.25 mM) and O <sub>2</sub> in MeOH. All reported concentrations are after mixing in the stopped-flow cell.                                                                                                                                                                                                                                                  | S23     |
| <b>Table S3.</b> Temperature-dependent pseudo 1 <sup>st</sup> order rate constants for the reaction between <b>3</b> ([ <b>3</b> ] <sub>0</sub> = 0.1 mM) and KO <sub>2</sub> solubilized with Kryptofix ® 222 in THF, under constant ionic strength (0.01 M) with 9.8-17.8 mM Bu <sub>4</sub> NPF <sub>6</sub> . All reported concentrations are after mixing in the stopped-flow cell.                                                                             | S24     |
| <b>Table S4.</b> DFT calculated (using the B3LYP functional and def2-TZVP basis set) Mulliken charges for the optimized structure of [Fe <sup>II</sup> (S <sub>2</sub> <sup>Me2</sup> N <sub>3</sub> (Pr,Pr)) ( <b>1</b> ) in THF, Fe <sup>II</sup> (S <sub>2</sub> <sup>Me2</sup> N <sub>3</sub> (Pr,Pr))•••H-OMe ( <b>1</b> •••H-OMe) in MeOH and [Fe <sup>III</sup> (S <sub>2</sub> <sup>Me2</sup> N <sub>3</sub> (Pr,Pr)(O <sub>2</sub> )] ( <b>2</b> ) in MeOH. | S25     |
| <b>Table S5.</b> Crystal data and structure refinement for [Fe <sup>II</sup> (S <sub>2</sub> <sup>Me2</sup> N <sub>3</sub> (Pr,Pr))•••H-OMe ( <b>1</b> •••H-OMe)                                                                                                                                                                                                                                                                                                     | S26     |
| <b>Table S6.</b> Atomic coordinates ( x 10 <sup>4</sup> ) and equivalent isotropic displacement parameters (Å <sup>2</sup> x 10 <sup>3</sup> ) for [Fe <sup>II</sup> (S <sub>2</sub> <sup>Me2</sup> N <sub>3</sub> (Pr,Pr))•••H-OMe ( <b>1</b> •••H-OMe). U(eq) is defined as one third of the trace of the orthogonalized U <sup>ij</sup> tensor.                                                                                                                   | S27     |
| <b>Table S7.</b> Bond lengths [Å] and angles [°] for [Fe <sup>II</sup> (S <sub>2</sub> <sup>Me2</sup> N <sub>3</sub> (Pr,Pr))•••H-OMe ( <b>1</b> •••H-OMe).                                                                                                                                                                                                                                                                                                          | S28-S33 |
| <b>Table S8.</b> Anisotropic displacement parameters (Å <sup>2</sup> x 10 <sup>3</sup> ) for [Fe <sup>II</sup> (S <sub>2</sub> <sup>Me2</sup> N <sub>3</sub> (Pr,Pr))•••H-OMe ( <b>1</b> •••H-OMe).                                                                                                                                                                                                                                                                  | S34     |
| <b>Table S9.</b> Hydrogen coordinates ( x 10 <sup>4</sup> ) and isotropic displacement parameters (Å <sup>2</sup> x 10 <sup>3</sup> ) for [Fe <sup>II</sup> (S <sub>2</sub> <sup>Me2</sup> N <sub>3</sub> (Pr,Pr))•••H-OMe ( <b>1</b> •••H-OMe).                                                                                                                                                                                                                     | S35-S36 |
| <b>Table S10.</b> DFT optimized bond lengths (using the B3LYP functional and def2-TZVP basis set) versus experimental distances for [Fe <sup>II</sup> (S <sub>2</sub> <sup>Me2</sup> N <sub>3</sub> (Pr,Pr))•••H-OMe ( <b>1</b> •••H-OMe) containing a MeOH solvent molecule H-bonded to one of the thiolate sulfurs, S(2).                                                                                                                                          | S37     |
| <b>Table S11.</b> DFT optimized bond lengths (using the B3LYP functional and def2-TZVP basis set) of [Fe <sup>II</sup> (S <sub>2</sub> <sup>Me2</sup> N <sub>3</sub> (Pr,Pr)) ( <b>1</b> ) in THF versus experimental distances.                                                                                                                                                                                                                                     | S37     |
| <b>Table S12.</b> DFT optimized bond lengths (using the B3LYP functional and def2-TZVP basis set) of [Fe <sup>III</sup> (S <sub>2</sub> <sup>Me2</sup> N <sub>3</sub> (Pr,Pr)(O <sub>2</sub> )] ( <b>2</b> ) in MeOH.                                                                                                                                                                                                                                                | S37     |
| <b>Table S13.</b> DFT optimized coordinates (using the B3LYP functional and def2-TZVP basis set) for [Fe <sup>II</sup> (S <sub>2</sub> <sup>Me2</sup> N <sub>3</sub> (Pr,Pr))•••H-OMe ( <b>1</b> •••H-OMe) in MeOH                                                                                                                                                                                                                                                   | S38-S39 |
| <b>Table S14.</b> DFT optimized coordinates (using the B3LYP functional and def2-TZVP basis set) for [Fe <sup>II</sup> (S <sub>2</sub> <sup>Me2</sup> N <sub>3</sub> (Pr,Pr)) ( <b>1</b> )                                                                                                                                                                                                                                                                           | S40-S41 |
| <b>Table S15.</b> DFT optimized coordinates (using the B3LYP functional and def2-TZVP basis set) for [Fe <sup>III</sup> (S <sub>2</sub> <sup>Me2</sup> N <sub>3</sub> (Pr,Pr)(O <sub>2</sub> )] ( <b>2</b> ) in MeOH                                                                                                                                                                                                                                                 | S42-S43 |
| <b>References</b>                                                                                                                                                                                                                                                                                                                                                                                                                                                    | S44     |

## EXPERIMENTAL PROCEDURES

**General Methods.** Reagents purchased from commercial vendors were of the highest purity available and used without further purification.  $[\text{Fe}^{\text{II}}(\text{S}_2^{\text{Me}_2}\text{N}_3(\text{Pr},\text{Pr}))]$  (**1**) and  $[\text{Fe}^{\text{III}}(\text{S}_2^{\text{Me}_2}\text{N}_3(\text{Pr},\text{Pr}))]\text{PF}_6$  (**3**) were synthesized as previously described.<sup>1, 2</sup> Methanol (MeOH) was distilled over magnesium turnings and iodine and degassed prior to use. Unstabilized tetrahydrofuran (THF) was rigorously degassed and purified using solvent purification columns housed in a custom stainless-steel cabinet, dispensed via a stainless steel Schlenk line (GlassContour). All manipulations were performed using Schlenk line techniques or under an  $\text{N}_2$  atmosphere in a glovebox.

**Evans Method of  $[\text{Fe}^{\text{II}}(\text{S}_2^{\text{Me}_2}\text{N}_3(\text{Pr},\text{Pr}))]$  (**1**).**  $^1\text{H-NMR}$  spectra were recorded on Bruker AV 301 FT-NMR spectrometers and are referenced to residual protio-solvent. Chemical shifts are reported in ppm. The magnetic moment of **1** was determined to be  $\mu_{\text{eff}} = 4.69$  B.M (MeOH), and  $\mu_{\text{eff}} = 4.08$  B.M. (THF) using the Evans method.

**Kinetic Measurements.** Solutions were prepared in a  $\text{N}_2$ -filled anaerobic glove-box ( $[\text{O}_2] < 1$  ppm) and placed in Hamilton gastight<sup>®</sup> syringes equipped with three-way valves. Time-resolved spectra (350–820 nm) were acquired at low temperatures using a TgK Scientific (U.K.) CSF-61DX2 Multi-Mixing CryoStopped-Flow Instrument equipped with a tungsten visible light source. The stopped-flow instrument is equipped with PEEK tubing fitted inside stainless-steel plumbing, a  $1.00 \text{ cm}^3$  quartz mixing cell, and an anaerobic kit purged with an inert gas. The temperature in the mixing cell was maintained to  $\pm 0.1$  °C, and the mixing time was 2-3 ms. All flow lines of the instrument were extensively washed with degassed, anhydrous THF or MeOH before charging the driving syringes with solutions containing the reactants. The reactions were studied by rapid scanning

spectrophotometry under pseudo-first order conditions with excess oxygen or superoxide. Saturated solutions of O<sub>2</sub> were prepared as described below. The O<sub>2</sub> concentration was assumed not to change upon cooling, given that the system is closed, and the solutions were not in contact with the gas phase (small variations in the solvent density were not taken into account). Dilutions of the O<sub>2</sub>-saturated solvent were performed anaerobically to obtain the desired [O<sub>2</sub>]. Potassium superoxide solutions were prepared as described below. All concentrations reported in stopped-flow experiments refer to the “after mixing” conditions. Experiments were performed in single-mixing mode, with a 1:1 (v/v) mixing ratio. A series of three or four measurements with outliers (Grubbs test, 95 % confidence interval)<sup>3</sup> removed prior to data averaging gave an acceptable standard deviation (within 10%). Rates reported for the oxygen dependence are the average of at least three different experiments. Data analysis was performed with Kinetic Studio software from TgK Scientific.<sup>4</sup> Data was fit at a single wavelength (523.5 nm) using the following equation:

$$A_t = A_\infty - (A_\infty - A_0)e^{-k_{obs}t} \quad (1)$$

The reaction order with respect to O<sub>2</sub> was determined by varying the O<sub>2</sub> concentration over the range of 1.975 mM to 3.95 mM in THF, and 2.55 mM to 4.25 mM in MeOH, while maintaining a constant Fe(II) concentration (0.1 mM).

Kinetics for the formation of **2** via an alternate route involving KO<sub>2</sub> + Fe(III)-**3** were monitored at λ= 523 nm under pseudo first order

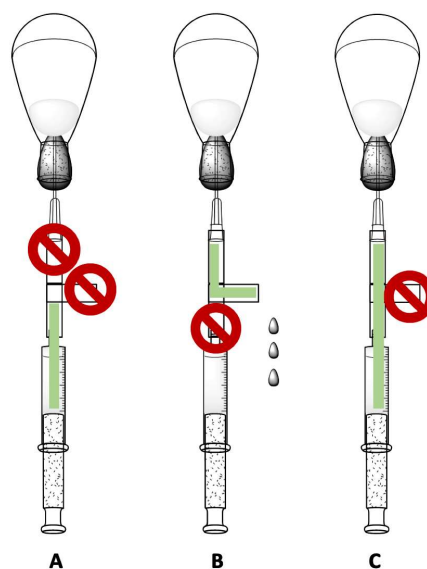

conditions with excess  $\text{KO}_2$  (solubilized with Kryptofix ® 222) using a TgK stopped-flow instrument and CCD detector. Constant ionic strength (0.01 M) conditions were maintained by adding an appropriate amount of  $\text{Bu}_4\text{NPF}_6$ . Kinetic traces were fit to the single exponential of eqn (1) with very small residuals (Figure S8).<sup>4</sup> Data was analyzed using Grubb's test<sup>3</sup> providing a 95% confidence level.

**Preparation of Saturated Dioxygen Solutions.** Degassed solvent (MeOH or THF) was added to a round bottom flask fitted with a septum cap under a nitrogen atmosphere in the glovebox. Dry  $\text{O}_2$  (from a gas cylinder) was bubbled through the solvent at 1 atm for 15 min. The solution was then allowed to equilibrate over 15 minutes at 25 °C in a temperature-controlled water bath. The concentration of  $\text{O}_2$  was taken as 8.5 mM in MeOH, and 7.9 mM in THF both at 25 °C.<sup>5</sup> To load the syringe in preparation for stopped-flow experiments, the flask was inverted and a gastight syringe equipped with a 3-way valve and needle was inserted through the septum (Position A in Figure on the right). The valve was then turned to allow the saturated solution to flow through the open arm of the 3-way valve, leaving no headspace in the needle (Position B). The valve was then closed, and the dioxygen solution drawn into the syringe (Position C).

**Dilution of Dioxygen Solutions.** Dilutions of the  $\text{O}_2$ -saturated solvent were performed anaerobically by attaching a second syringe filled with an excess of an appropriate

quantity of deoxygenated solvent to the open arm of the 3-way valve (Position D in Figure below). Air bubbles trapped in the valve by this process were purged by flowing the excess solvent through the needle down to the quantity of solvent necessary for the desired O<sub>2</sub> concentration (Position E). The valve was then turned to allow the two needles to communicate, and the

saturated O<sub>2</sub> solution was drawn into the deoxygenated solvent until the desired O<sub>2</sub> concentration is met

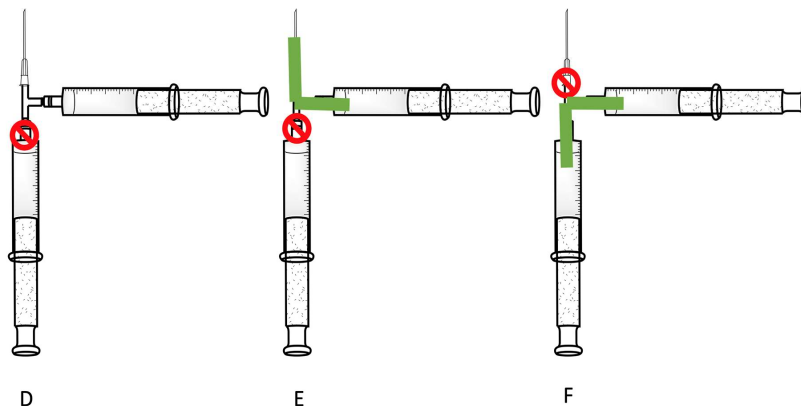

(Position F). The dilute O<sub>2</sub> solution was then allowed to equilibrate for 30 min after which time it was ready for use. This dilution process can be repeated in the same manner if it is not practical to attain the desired O<sub>2</sub> concentration via one dilution.

**Preparation of Potassium Superoxide Solutions.** A very fine powder of KO<sub>2</sub> was weighed out on an analytical balance, and then 1 eq. of Kryptofix®222 was added to solubilize the KO<sub>2</sub> in THF. The solution was vigorously stirred at RT in a glovebox for at least 20 mins and used within 6 hrs of preparation. An appropriate amount of Bu<sub>4</sub>NPF<sub>6</sub> (9.8 – 17.8 mM pre-mix concentration) was added to maintain a constant ionic strength of 10 mM (post-mix concentration). Kinetic traces were fit to the single exponential of eqn (1) with very small residuals (Figure S14).

**Computational Details.** Calculations were performed using the ORCA v. 5.0.4 quantum chemistry package developed by Neese and coworkers,<sup>6</sup> and employed a polarized triple-

zeta def2-TZVP basis set, the def2/J auxiliary basis set for Coulomb fitting, and the atom-pairwise dispersion correction of Grimme (D3BJ).<sup>7</sup> Tight convergence criteria were required for self-consistent field (SCF) solutions. The DEFGRID3 integration grid size, and the conductor-like polarizable continuum model with the dielectric constant  $\epsilon = 7.25$  for tetrahydrofuran solvent (CPCM(THF)), or the dielectric constant  $\epsilon = 32.63$  for methanol solvent (CPCM(MeOH)), were used for geometry optimizations.<sup>8</sup> Geometry optimizations and analytical frequency calculations were performed using the B3LYP functional, with the resolution of identity (RI) chain-of-spheres (RIJCOSX) approximation,<sup>9, 10</sup> and initiated from the crystallographic coordinates when available. Analytical frequency calculations were performed on all optimized structures to determine whether the obtained stationary points corresponded to local minima.

Calculations for the Fe(III)-superoxo complex,  $[\text{Fe}^{\text{III}}(\text{S}_2^{\text{Me}_2}\text{N}_3(\text{Pr},\text{Pr})(\text{O}_2)]$  (**4**) employed the broken-symmetry formalism to model coupled paramagnetic sites. The previously reported<sup>1</sup> DFT optimized structure of superoxo  $[\text{Fe}^{\text{III}}(\text{S}_2^{\text{Me}_2}\text{N}_3(\text{Pr},\text{Pr})(\text{O}_2)]$  (**2**) was used as a starting point for the calculated structure in a polarizable continuum model in MeOH. Hybrid time-dependent DFT (TD-DFT) calculations employed the RIJCOSX and the Tamm-Dancoff approximations (TDA).<sup>11, 12</sup> The Fermi level, i.e., the halfway between the calculated HOMO and LUMO energies, was set to 0 eV in molecular orbital (MO) analysis. Excited states from TD-DFT calculations were analyzed using Natural Transition orbitals (NTOs) and by visualizing their difference densities between the ground and excited states. Canonical molecular orbital isosurfaces and natural transition orbitals in the TD-DFT calculations were visualized at an isovalue of  $0.08 \text{ a}_0^3$  using UCSF Chimera.<sup>13</sup>

**X-ray Crystallographic Structure Determination.** A yellow needle, measuring 0.36 x 0.04 x 0.03 mm<sup>3</sup> was mounted on a loop with oil. Data was collected at -173°C on a Bruker APEX II single crystal X-ray diffractometer, Mo-radiation, equipped with a Miracol X-ray optical collimator.

Crystal-to-detector distance was 40 mm and exposure time was 20 seconds per frame for all sets. The scan width was 0.5°. Data collection was 100% complete to 25° in  $\theta$ . A total of 20760 reflections were collected covering the indices,  $-25 \leq h \leq 25$ ,  $-16 \leq k \leq 16$ ,  $-12 \leq l \leq 12$ . 5450 reflections were symmetry independent and the  $R_{\text{int}} = 0.0595$  indicated that the data was good. Indexing and unit cell refinement indicated a primitive orthorhombic lattice. The space group was found to be  $Pc2_1$  (No. 29).

The data was integrated and scaled using SAINT, SADABS within the APEX2 software package by Bruker.<sup>14</sup> Solution by direct methods (SHELXT<sup>15, 16</sup>) produced a complete heavy atom phasing model consistent with the proposed structure. The structure was completed by difference Fourier synthesis with SHELXL.<sup>16, 17</sup> Scattering factors are from Waasmair and Kirfel.<sup>18</sup> Hydrogen atoms were placed in geometrically idealized positions and constrained to ride on their parent atoms with C---H distances in the range 0.95-1.00 Angstrom. Isotropic thermal parameters  $U_{\text{eq}}$  were fixed such that they were  $1.2U_{\text{eq}}$  of their parent atom  $U_{\text{eq}}$  for CH's and  $1.5U_{\text{eq}}$  of their parent atom  $U_{\text{eq}}$  in case of methyl groups. All non-hydrogen atoms were refined anisotropically by full-matrix least-squares.

Crystallographic data is presented as ray-traced ORTEP plot.<sup>19</sup> The structural overlays (Fig. 11, main text) were generated using BIOVIA Discovery Studio software.<sup>20</sup>



**Derivation of the Rate Expression.** The general kinetic scheme, eqn (2), and a derivation of the rate expression is shown in eqns (3) – (10).<sup>21</sup> This derivation uses mass balance (eqn (4)), and assumes that the concentration of **2** at any given time,  $[\text{FeO}_2]_t$ , is equal to the initial concentration of **1**,  $[\text{Fe}^{\text{II}}]_0$ , minus the concentration of **1** at any given

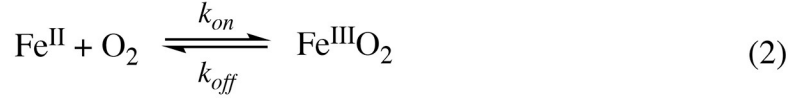

$$\frac{d[\text{Fe}^{\text{III}}\text{O}_2]}{dt} = k_{\text{on}}[\text{Fe}^{\text{II}}]_t[\text{O}_2] - k_{\text{off}}[\text{Fe}^{\text{III}}\text{O}_2]_t \quad (3)$$

$$[\text{Fe}^{\text{II}}]_0 = [\text{Fe}^{\text{II}}]_t + [\text{Fe}^{\text{III}}\text{O}_2]_t \quad (4)$$

$$[\text{Fe}^{\text{III}}\text{O}_2]_t = [\text{Fe}^{\text{II}}]_0 - [\text{Fe}^{\text{II}}]_t \quad (5)$$

$$\frac{d[\text{Fe}^{\text{III}}\text{O}_2]}{dt} = k_{\text{on}}[\text{Fe}^{\text{II}}]_t[\text{O}_2] - k_{\text{off}}([\text{Fe}^{\text{II}}]_0 - [\text{Fe}^{\text{II}}]_t) \quad (6)$$

$$= k_{\text{on}}[\text{Fe}^{\text{II}}]_t[\text{O}_2] + k_{\text{off}}[\text{Fe}^{\text{II}}]_t - k_{\text{off}}[\text{Fe}^{\text{II}}]_0 \quad (7)$$

$$= [\text{Fe}^{\text{II}}]_t (k_{\text{on}}[\text{O}_2] + k_{\text{off}}) - k_{\text{off}}[\text{Fe}^{\text{II}}]_0 \quad (8)$$

$$\frac{d[\text{Fe}^{\text{III}}\text{O}_2]}{dt} = k_{\text{obs}}[\text{Fe}^{\text{II}}]_t - C \quad (9)$$

$$k_{\text{obs}} = k_{\text{on}}[\text{O}_2] + k_{\text{off}} \quad (10)$$

time,  $[\text{Fe}^{\text{II}}]_t$ . Solving for the unknown concentration of superoxo **2**,  $[\text{FeO}_2]_t$  in terms of  $[\text{Fe}^{\text{II}}]_0$  and  $[\text{Fe}^{\text{II}}]_t$  (eqn (5)), and substituting this into eqn (3), we obtain eqn (6), which simplifies to eqn (8). Under pseudo first order conditions with excess  $\text{O}_2$  the rate expression is that of eqn (9), with  $k_{\text{obs}}$  defined in eqn (10). The term  $k_{\text{off}}[\text{Fe}^{\text{II}}]_0$  is a constant, C (eqn (9)), that does not change with time, therefore it does not affect the measured rate constant  $k_{\text{obs}}$ . The magnitude of C is small relative to the other terms when working with sub-mM concentrations of  $[\text{Fe}^{\text{II}}]_0$ , and thus it can be dropped from eqn (9).<sup>21</sup> For a reversible process under pseudo first-order conditions with excess  $\text{O}_2$ ,  $k_{\text{obs}}$

would be dependent on both  $k_{\text{off}}$  and  $k_{\text{on}}$ ,<sup>21</sup> wherein the former can be obtained from the intercept, and the latter from the slope.

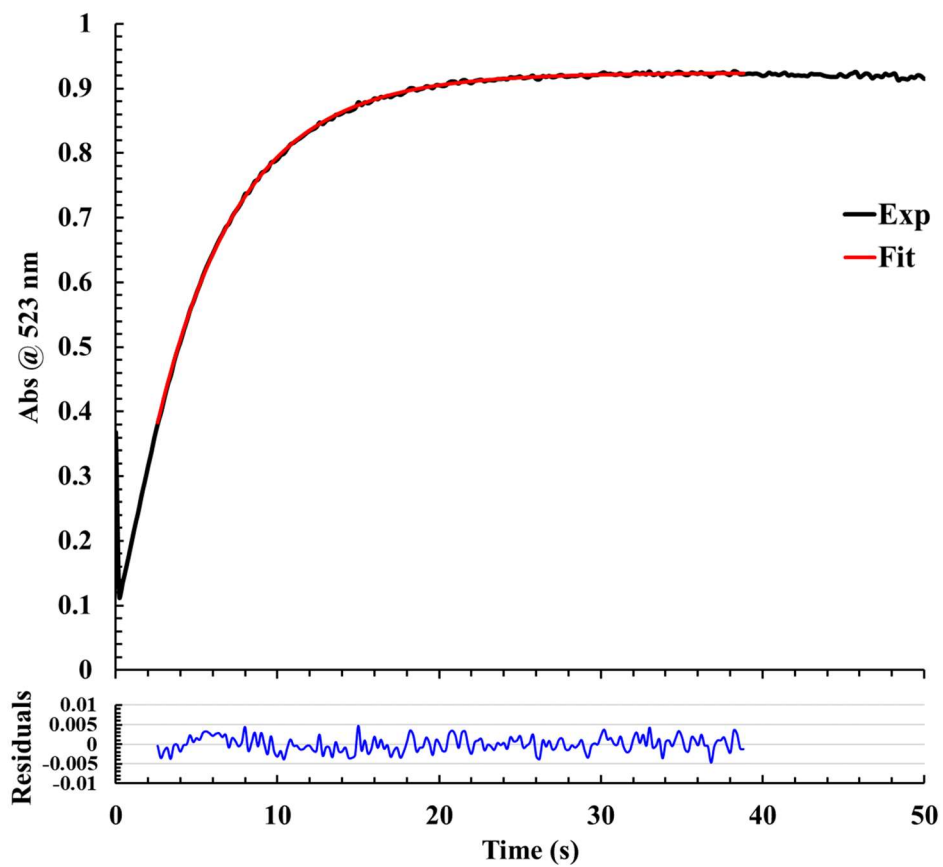

**Figure S1.** Kinetic trace at  $\lambda = 523$  nm acquired  $-40$  °C with  $[1] = 0.25$  mM and  $[O_2] = 4.0$  mM in THF (concentrations in the mixing cell are given). The experimental trace is shown in black; the pseudo-first order fit is shown in red; residuals in blue are appended to the bottom of the graph.

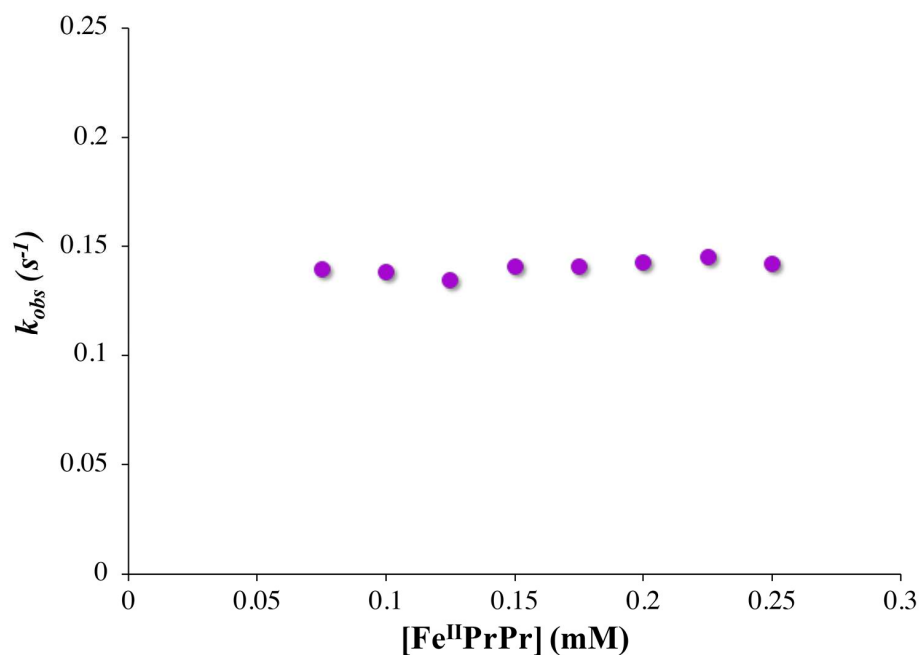

**Figure S2.** Plot of observed rate constants ( $k_{obs}$ ) for the formation of Fe<sup>III</sup>-superoxo **2** versus [Fe<sup>II</sup>(S<sub>2</sub><sup>Me2</sup>N<sub>3</sub>(Pr,Pr)) (**1**) concentration at -40 °C in THF. [O<sub>2</sub>] after mixing = 3.95 mM.

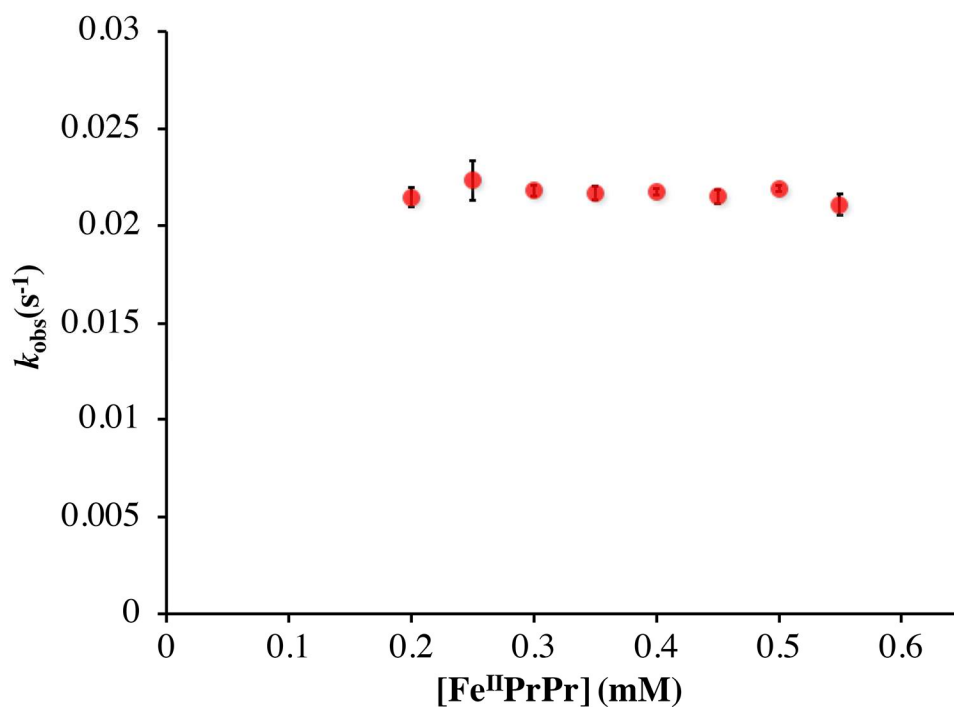

**Figure S3.** Plot of observed rate constants ( $k_{obs}$ ) for the formation of Fe<sup>III</sup>-superoxo **2** versus the concentration of [Fe<sup>II</sup>(S<sub>2</sub><sup>Me2</sup>N<sub>3</sub>(Pr,Pr)) (**1**) at 0 °C in MeOH. [O<sub>2</sub>] after mixing = 4.25 mM.

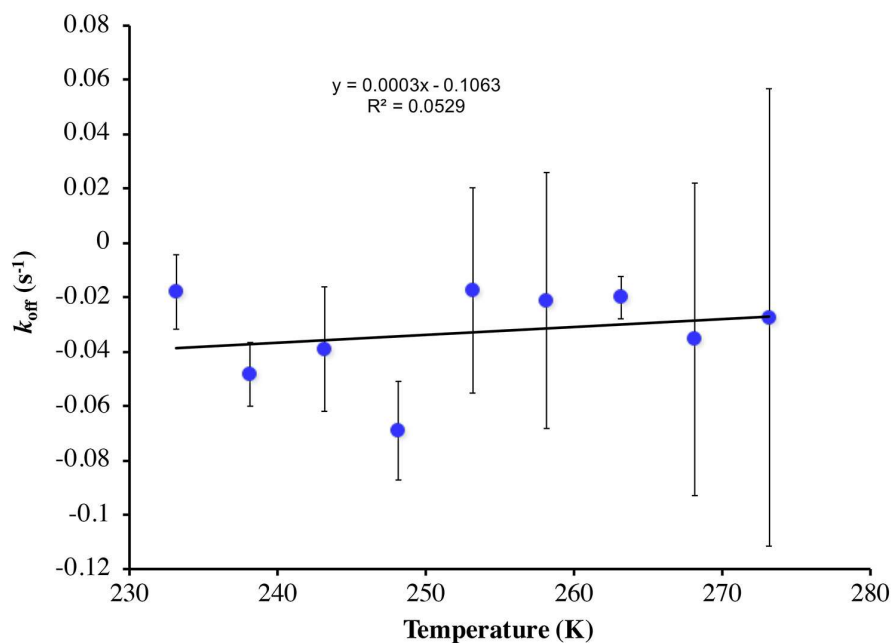

**Figure S4.** The dissociation rate constant,  $k_{\text{off}}$ , obtained from the y-intercept of the  $k_{\text{obs}}$  vs  $[\text{O}_2]$  plots of Figure 3 (main text), does not correlate with temperature in THF. This, coupled with the  $\sim$ zero intercept of Figure 3 would be consistent with irreversible  $\text{O}_2$  binding to **1** in this solvent.

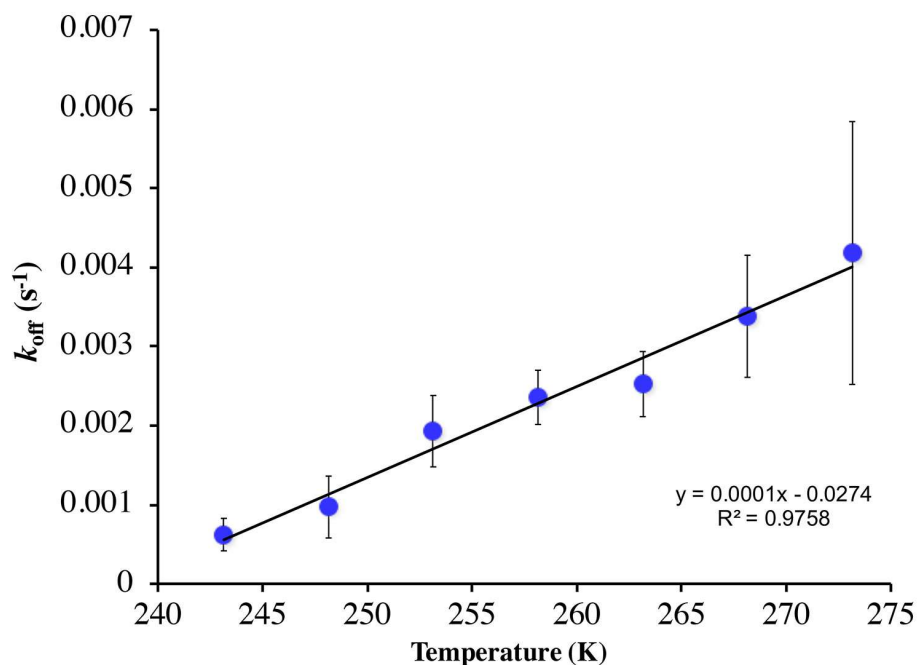

**Figure S5.** Correlation between temperature and rate constants for  $\text{O}_2$  release from superoxo **2**,  $k_{\text{off}}$ , in MeOH. Dissociation rate constants,  $k_{\text{off}}$ , were obtained from the y-intercept of the  $k_{\text{obs}}$  vs  $[\text{O}_2]$  plots (Figure 4 of main text)

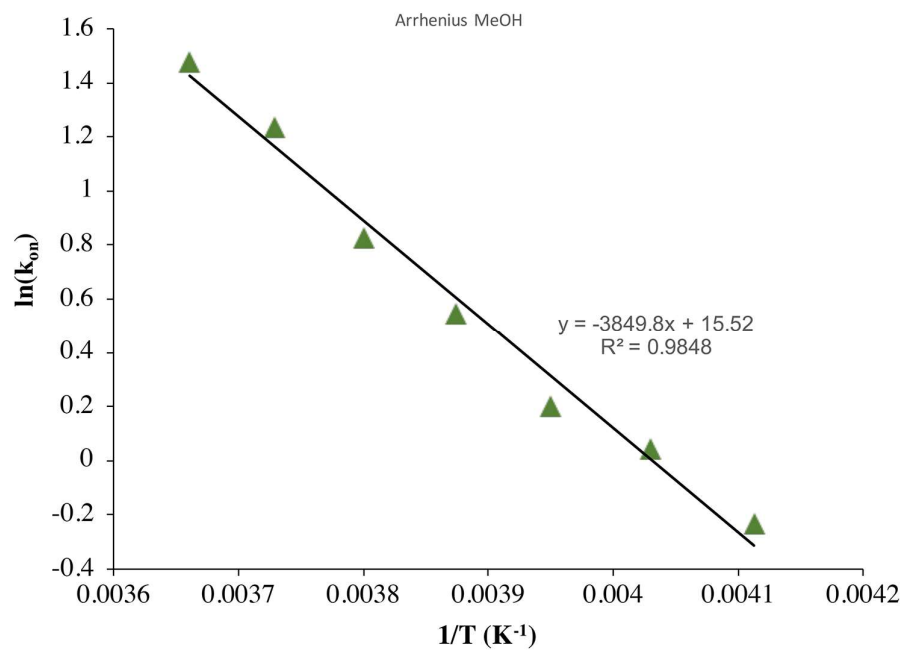

**Figure S6.** Arrhenius plot for O<sub>2</sub> binding to **1** in MeOH, from which activation parameter  $E_a = 32(2)$  kJ mol<sup>-1</sup> was obtained.

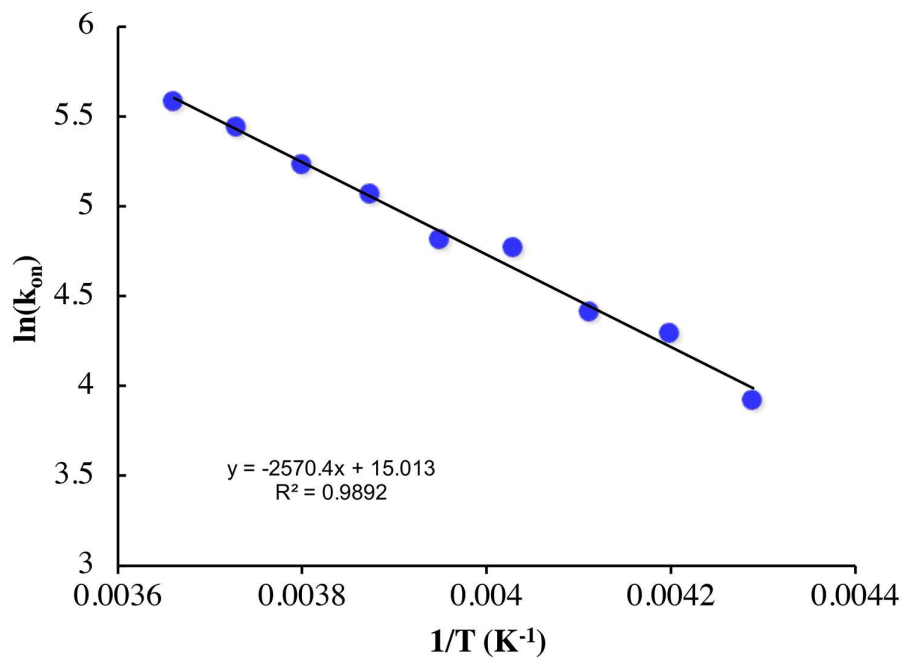

**Figure S7.** Arrhenius plot for O<sub>2</sub> binding to **1** in THF, from which activation parameter  $E_a = 21.4(8)$  kJ mol<sup>-1</sup> was obtained.

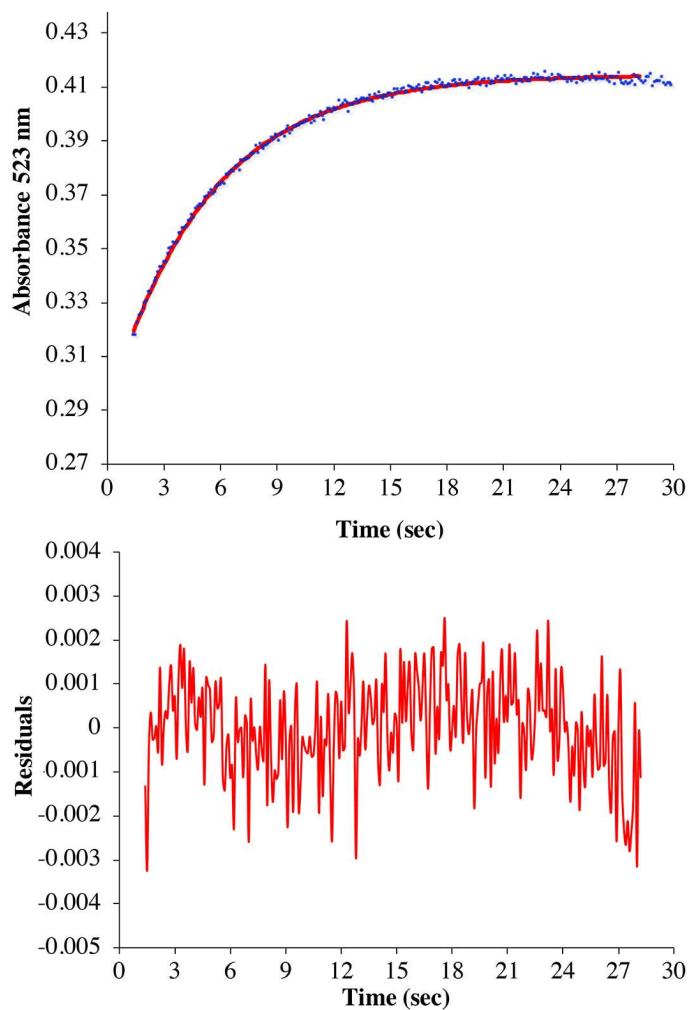

**Figure S8.** Kinetic trace for superoxide ( $\text{KO}_2$ ) binding to **3** monitored at  $\lambda = 523$  nm with  $[\mathbf{1}] = 0.1$  mM and  $[\text{KO}_2] = 5.0$  mM in THF at  $-40$  °C under a constant ionic strength of 0.01 M with added  $\text{Bu}_4\text{NPF}_6$  (concentrations listed are after mixing in the stopped-flow cell). The experimental data points are shown in blue; the pseudo-first order fit to eqn (1) of the main text is shown in red; residuals in red are appended to the bottom of the graph.

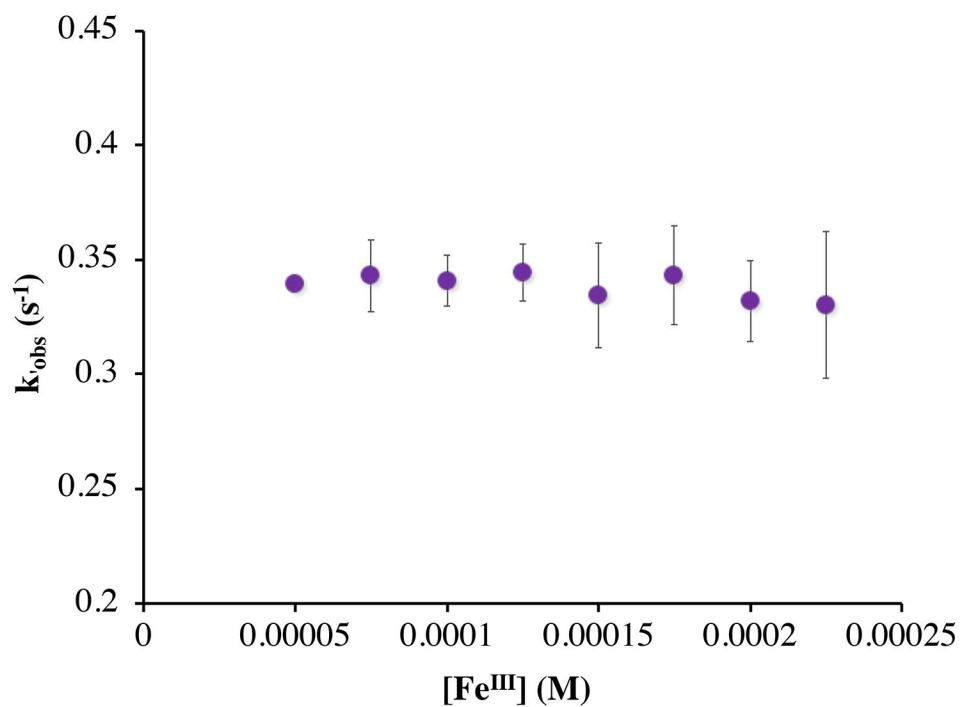

**Figure S9.** Zero order dependence of  $k_{\text{obs}}$  on Fe(III) concentration under pseudo first order conditions with excess  $\text{KO}_2$  (5 mM). This would be consistent with 1<sup>st</sup> order dependence on Fe(III) overall.



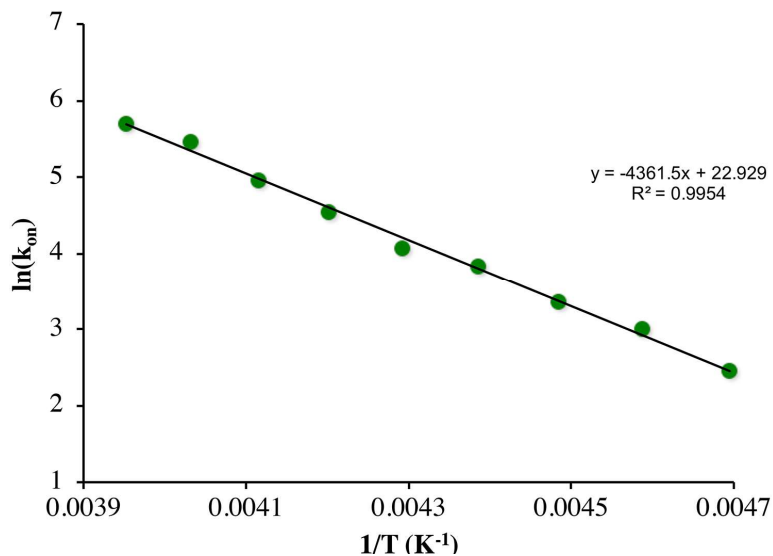

**Figure S10.** Arrhenius plot for superoxide ( $\text{KO}_2$  solubilized with KryptoFix) binding to Fe(III)-3 in THF.

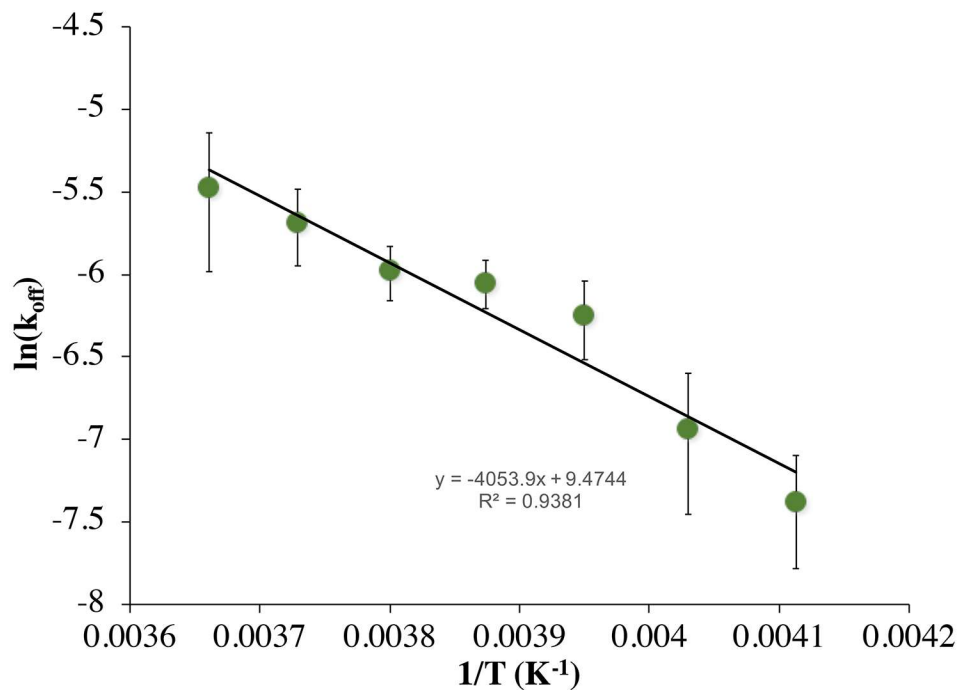

**Figure S11.** Arrhenius plot for  $\text{O}_2$  release from superoxo **2** in MeOH, from which the activation parameter  $E_a = 34(4) \text{ kJ mol}^{-1}$  was obtained.

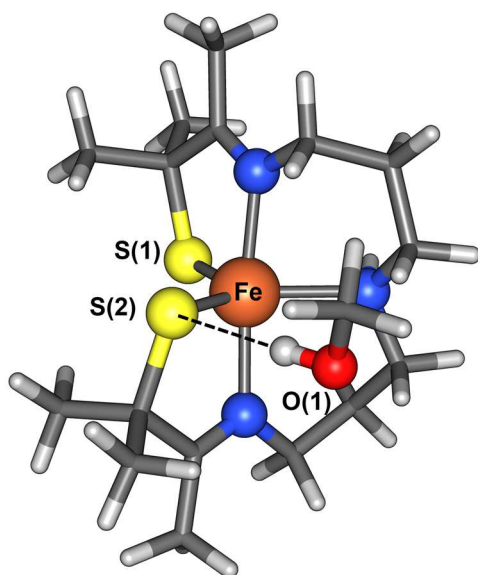

**Figure S12.** DFT optimized structure of  $[\text{Fe}^{\text{II}}(\text{S}_2^{\text{Me}_2}\text{N}_3(\text{Pr},\text{Pr}))]\cdots\text{H-OMe}$  (**1**) containing a MeOH solvent molecule H-bonded to one of the thiolate sulfurs, S(2). Calculated MeO(1)-H $\cdots$ S(2) distance is 2.224 Å (see Table S10).

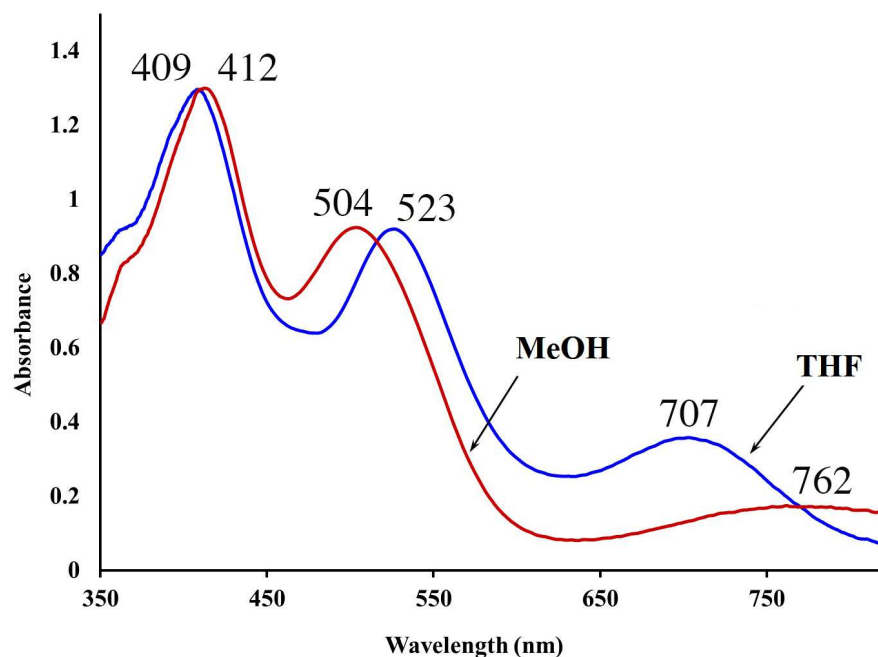

**Figure S13.** Experimental electronic absorption spectrum of  $\text{Fe}^{\text{III}}$ -superoxo **2** (0.25 mM) in THF vs MeOH.

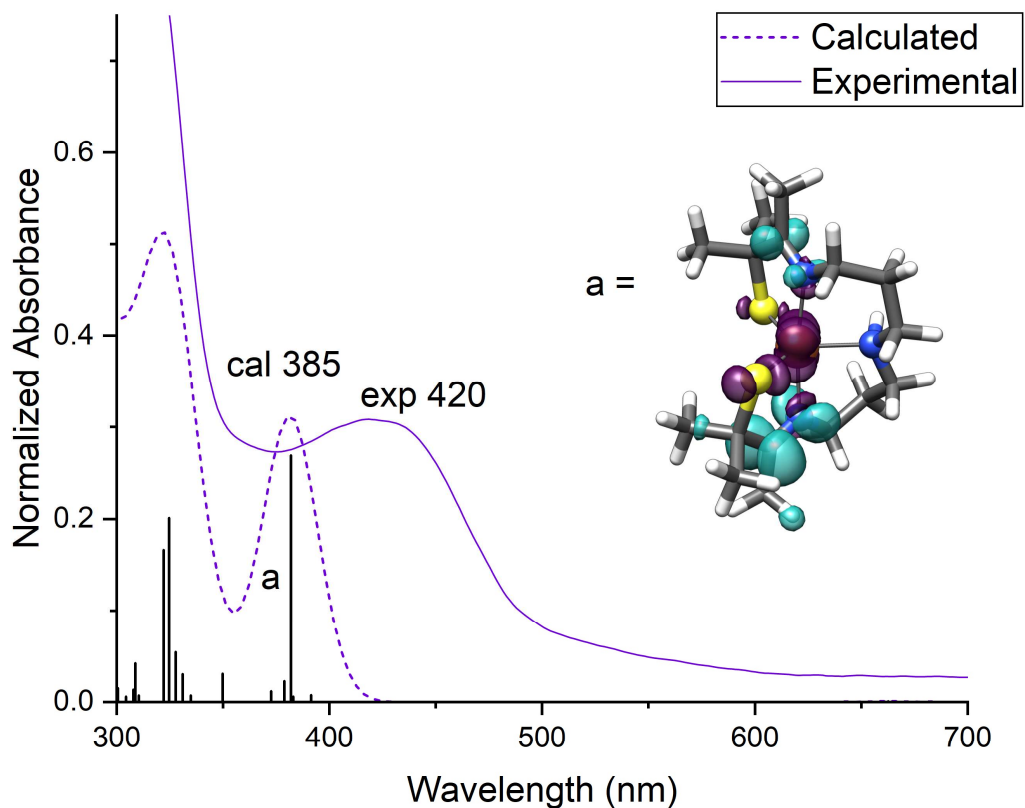

**Figure S14.** Time-dependent DFT (TD-DFT) calculated electronic absorption spectrum of  $[\text{Fe}^{\text{II}}(\text{S}_2^{\text{Me}_2}\text{N}_3(\text{Pr},\text{Pr}))]$  (**1**) modeled in THF (purple dashed line) overlaid with the experimental spectra (purple solid line). The computed transition of interest (black vertical sticks, a) is depicted with an electron difference density map where purple regions indicated electron density loss and the teal regions gain in electron density.

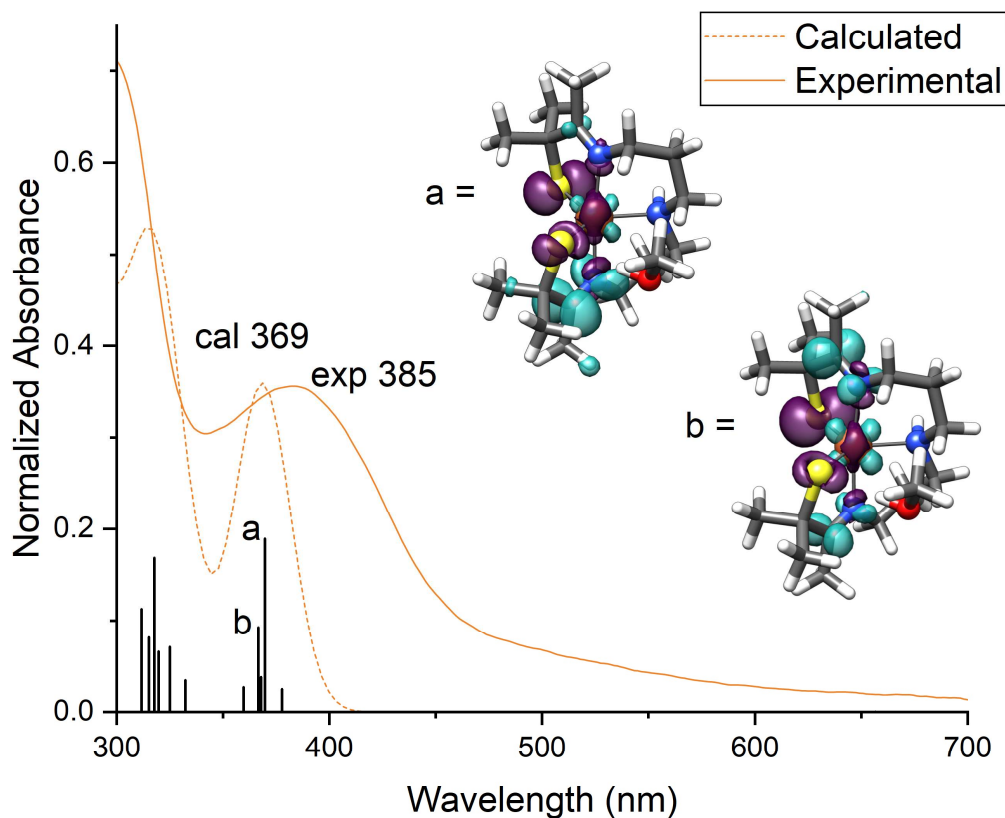

**Figure S15.** Time-dependent DFT (TD-DFT) calculated electronic absorption spectrum of  $[\text{Fe}^{\text{II}}(\text{S}_2^{\text{Me}_2}\text{N}_3(\text{Pr},\text{Pr}))]$  (**1**) modeled in MeOH (purple dashed line) overlaid with the experimental spectra (purple solid line). A MeOH solvent molecule H-bonded to one of the thiolate sulfurs causes the  $\text{S} \rightarrow \text{Fe}$  charge transfer band to blue shift relative to that shown in Figure S13. The computed transition of interest (black vertical sticks, a & b) is depicted with an electron density difference map where purple regions indicated electron density loss and the teal regions gain in electron density.

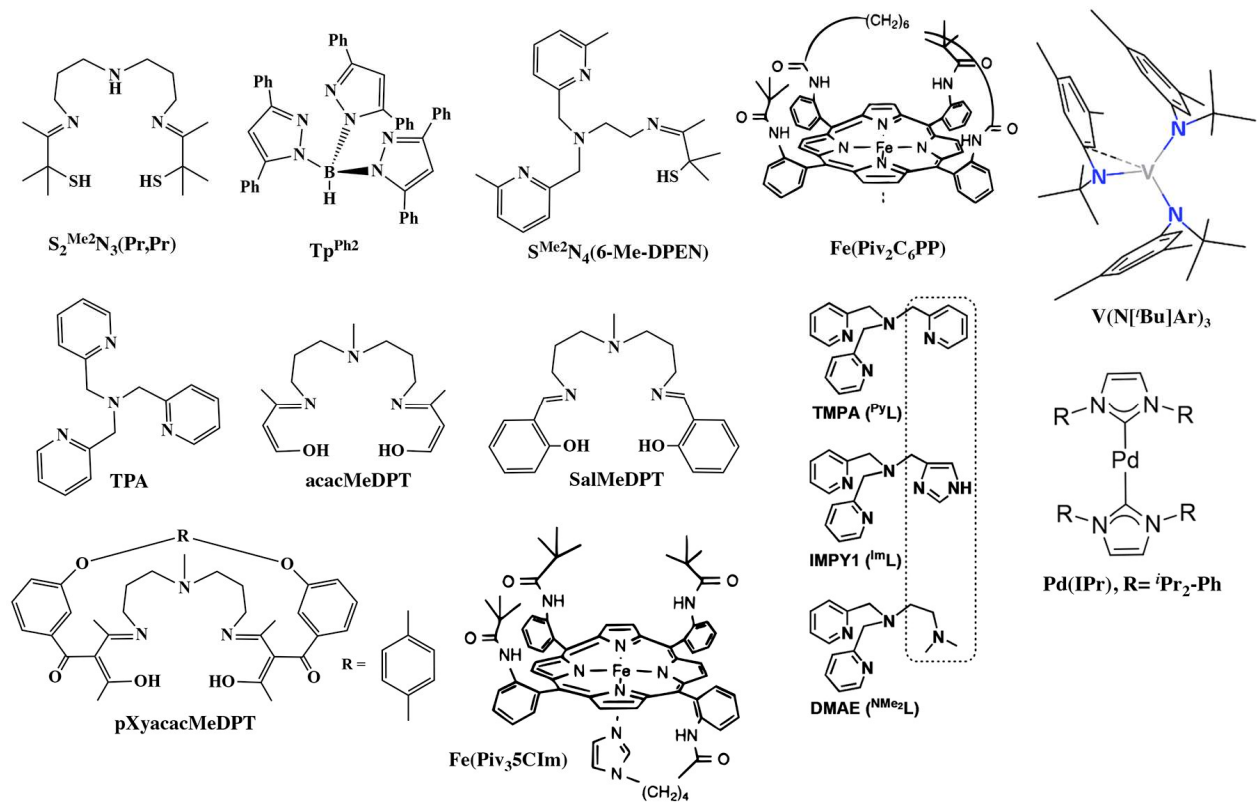

**Figure S16.** Chemdraw depiction of the ligands in Table 2 of main text.

**Table S1.** Temperature-dependent pseudo 1<sup>st</sup> order rate constants for the reaction between **1** ( $[1]_0 = 0.25$  mM) and O<sub>2</sub> in THF. All reported concentrations are after mixing in the stopped-flow cell.

| Temperature (°C) | [O <sub>2</sub> ] (mM) | <i>k</i> <sub>obs</sub> (s <sup>-1</sup> ) |
|------------------|------------------------|--------------------------------------------|
| 0                | 1.975                  | 0.534(6)                                   |
|                  | 2.37                   | 0.586(7)                                   |
|                  | 2.765                  | 0.651(1)                                   |
|                  | 3.4                    | 0.912(1)                                   |
|                  | 3.95                   | 1.02(2)                                    |
| -5               | 1.975                  | 0.434(13)                                  |
|                  | 2.37                   | 0.514(8)                                   |
|                  | 2.765                  | 0.593(9)                                   |
|                  | 3.4                    | 0.709(10)                                  |
|                  | 3.95                   | 0.907(9)                                   |
| -10              | 1.975                  | 0.345(73)                                  |
|                  | 2.37                   | 0.421(21)                                  |
|                  | 2.765                  | 0.496(72)                                  |
|                  | 3.4                    | 0.618(12)                                  |
|                  | 3.95                   | 0.711(61)                                  |
| -15              | 1.975                  | 0.300(4)                                   |
|                  | 2.37                   | 0.364(5)                                   |
|                  | 2.765                  | 0.406(1)                                   |
|                  | 3.4                    | 0.487(11)                                  |
|                  | 3.95                   | 0.630(8)                                   |
| -20              | 1.975                  | 0.243(9)                                   |
|                  | 2.37                   | 0.265(10)                                  |
|                  | 2.765                  | 0.310(4)                                   |
|                  | 3.4                    | 0.382(4)                                   |
|                  | 3.95                   | 0.486(3)                                   |
| -25              | 1.975                  | 0.157(1)                                   |
|                  | 2.37                   | 0.216(1)                                   |
|                  | 2.765                  | 0.259(3)                                   |
|                  | 3.4                    | 0.317(6)                                   |
|                  | 3.95                   | 0.399(7)                                   |
| -30              | 1.975                  | 0.109(7)                                   |
|                  | 2.37                   | 0.167(16)                                  |
|                  | 2.765                  | 0.197(4)                                   |
|                  | 3.4                    | 0.236(11)                                  |
|                  | 3.95                   | 0.281(30)                                  |
| -35              | 1.975                  | 0.089(3)                                   |
|                  | 2.37                   | 0.128(1)                                   |
|                  | 2.765                  | 0.155(1)                                   |
|                  | 3.4                    | 0.204(3)                                   |
|                  | 3.95                   | 0.234(2)                                   |
| -40              | 1.975                  | 0.0767(20)                                 |
|                  | 2.37                   | 0.110(8)                                   |
|                  | 2.765                  | 0.118(23)                                  |
|                  | 3.4                    | 0.147(13)                                  |
|                  | 3.95                   | 0.183(11)                                  |

**Table S2.** Observed rate constants for the reaction between **1** ( $[1]_0 = 0.25$  mM) and O<sub>2</sub> in MeOH. All reported concentrations are after mixing in the stopped-flow cell.

| Temperature (°C) | [O <sub>2</sub> ] (mM) | $k_{obs}$ (s <sup>-1</sup> ) |
|------------------|------------------------|------------------------------|
| 0                | 2.55                   | 0.0152(6)                    |
|                  | 2.975                  | 0.0168(9)                    |
|                  | 3.40                   | 0.0199(8)                    |
|                  | 3.825                  | 0.021(1)                     |
|                  | 4.25                   | 0.0223(10)                   |
| -5               | 2.55                   | 0.0121(1)                    |
|                  | 2.975                  | 0.0134(1)                    |
|                  | 3.40                   | 0.0154(1)                    |
|                  | 3.825                  | 0.0167(1)                    |
|                  | 4.25                   | 0.0178(2)                    |
| -10              | 2.55                   | 0.00835(21)                  |
|                  | 2.975                  | 0.00919(76)                  |
|                  | 3.40                   | 0.0105(7)                    |
|                  | 3.825                  | 0.0112(1)                    |
|                  | 4.25                   | 0.0122(8)                    |
| -15              | 2.55                   | 0.00674(17)                  |
|                  | 2.98                   | 0.00740(35)                  |
|                  | 3.40                   | 0.00834(10)                  |
|                  | 3.825                  | 0.00908(1)                   |
|                  | 4.25                   | 0.00957(2)                   |
| -20              | 2.55                   | 0.00485(21)                  |
|                  | 2.98                   | 0.00575(53)                  |
|                  | 3.40                   | 0.00619(31)                  |
|                  | 3.825                  | 0.00658(15)                  |
|                  | 4.25                   | 0.00703(5)                   |
| -25              | 2.55                   | 0.00369(1)                   |
|                  | 2.98                   | 0.00389(3)                   |
|                  | 3.40                   | 0.00470(17)                  |
|                  | 3.825                  | 0.00495(12)                  |
|                  | 4.25                   | 0.00539(27)                  |
| -30              | 2.55                   | 0.00262(22)                  |
|                  | 2.98                   | 0.00301(2)                   |
|                  | 3.40                   | 0.00337(25)                  |
|                  | 3.825                  | 0.00354(2)                   |
|                  | 4.25                   | 0.00403(3)                   |

**Table S3.** Temperature-dependent pseudo 1<sup>st</sup> order rate constants for the reaction between **3** ( $[3]_0 = 0.1$  mM) and  $\text{KO}_2$  solubilized with Kryptofix ® 222 in THF, under constant ionic strength (0.01 M) with 1.5-11.5 mM  $\text{Bu}_4\text{NPF}_6$ . All reported concentrations are after mixing in the stopped-flow cell.

| Temperature (°C) | $[\text{O}_2^{\cdot-}]$ (mM) | $k_{obs}$ (s <sup>-1</sup> ) |
|------------------|------------------------------|------------------------------|
| -20              | 1.0                          | 0.393(1)                     |
|                  | 2.0                          | 0.642(12)                    |
|                  | 3.0                          | 0.959(87)                    |
|                  | 4.0                          | 1.226(30)                    |
|                  | 5.0                          | 1.592(12)                    |
| -25              | 1.0                          | 0.322(13)                    |
|                  | 2.0                          | 0.442(14)                    |
|                  | 3.0                          | 0.637(26)                    |
|                  | 4.0                          | 0.936(65)                    |
|                  | 5.0                          | 1.251(63)                    |
| -30              | 1.0                          | 0.225(4)                     |
|                  | 2.0                          | 0.296(5)                     |
|                  | 3.0                          | 0.431(51)                    |
|                  | 4.0                          | 0.562(20)                    |
|                  | 5.0                          | 0.801(31)                    |
| -35              | 1.0                          | 0.172(5)                     |
|                  | 2.0                          | 0.195(4)                     |
|                  | 3.0                          | 0.288(7)                     |
|                  | 4.0                          | 0.406(36)                    |
|                  | 5.0                          | 0.539(33)                    |
| -40              | 1.0                          | 0.123(5)                     |
|                  | 2.0                          | 0.159(16)                    |
|                  | 3.0                          | 0.226(18)                    |
|                  | 4.0                          | 0.288(83)                    |
|                  | 5.0                          | 0.351(9)                     |
| -45              | 1.0                          | 0.092(8)                     |
|                  | 2.0                          | 0.117(3)                     |
|                  | 3.0                          | 0.166(5)                     |
|                  | 4.0                          | 0.204(23)                    |
|                  | 5.0                          | 0.278(13)                    |
| -50              | 1.0                          | 0.0585(67)                   |
|                  | 2.0                          | 0.0761(57)                   |
|                  | 3.0                          | 0.110(5)                     |
|                  | 4.0                          | 0.133(5)                     |
|                  | 5.0                          | 0.174(11)                    |
| -55              | 1.0                          | 0.0443(51)                   |
|                  | 2.0                          | 0.0588(10)                   |
|                  | 3.0                          | 0.0685(20)                   |
|                  | 4.0                          | 0.0992(23)                   |
|                  | 5.0                          | 0.125(10)                    |
| -60              | 1.0                          | 0.0368(12)                   |
|                  | 2.0                          | 0.0488(13)                   |
|                  | 3.0                          | 0.0585(67)                   |
|                  | 4.0                          | 0.0694(7)                    |
|                  | 5.0                          | 0.0844(51)                   |



**Table S4.** DFT calculated (using the B3LYP functional and def2-TZVP basis set) Mulliken charges for the optimized structure of  $[\text{Fe}^{\text{II}}(\text{S}_2^{\text{Me}_2}\text{N}_3(\text{Pr},\text{Pr}))]$  (**1**) in THF,  $\text{Fe}^{\text{II}}(\text{S}_2^{\text{Me}_2}\text{N}_3(\text{Pr},\text{Pr}))\cdots\text{H-Ome}$  (**1 $\cdots$ H-Ome**) in MeOH and  $[\text{Fe}^{\text{III}}(\text{S}_2^{\text{Me}_2}\text{N}_3(\text{Pr},\text{Pr})(\text{O}_2))]$  (**2**) in MeOH.

| Atom | Mulliken Charges |                          |           |
|------|------------------|--------------------------|-----------|
|      | 1 in THF         | 1 $\cdots$ H-Ome in MeOH | 2 in MeOH |
| Fe   | +0.425           | +0.447                   | +0.044    |
| S(1) | -0.676           | -0.678                   | -0.482    |
| S(2) | -0.663           | -0.662                   | -0.519    |
| N(1) | -0.133           | -0.132                   | +0.002    |
| N(2) | -0.314           | -0.318                   | -0.186    |
| N(3) | -0.133           | -0.149                   | +0.088    |
| O(1) | NA               | -0.525                   | NA        |
| H(1) | NA               | +0.295                   | NA        |

**Table S5.** Crystal data and structure refinement for [Fe<sup>II</sup>(S<sub>2</sub>Me<sub>2</sub>N<sub>3</sub>(Pr,Pr))•••H-OMe (1•••H-OMe)].

|                                   |                                                                    |          |
|-----------------------------------|--------------------------------------------------------------------|----------|
| Identification code               | mg2156_0m                                                          |          |
| Empirical formula                 | C <sub>17</sub> H <sub>35</sub> Fe N <sub>3</sub> O S <sub>2</sub> |          |
| Formula weight                    | 417.45                                                             |          |
| Temperature                       | 100(2) K                                                           |          |
| Wavelength                        | 0.71073 Å                                                          |          |
| Crystal system                    | Orthorhombic                                                       |          |
| Space group                       | P c a 2 <sub>1</sub>                                               |          |
| Unit cell dimensions              | a = 19.3307(8) Å                                                   | α = 90°. |
|                                   | b = 12.1908(5) Å                                                   | β = 90°. |
|                                   | c = 9.1228(3) Å                                                    | γ = 90°. |
| Volume                            | 2149.85(14) Å <sup>3</sup>                                         |          |
| Z                                 | 4                                                                  |          |
| Density (calculated)              | 1.290 Mg/m <sup>3</sup>                                            |          |
| Absorption coefficient            | 0.905 mm <sup>-1</sup>                                             |          |
| F(000)                            | 896                                                                |          |
| Crystal size                      | 0.360 x 0.040 x 0.030 mm <sup>3</sup>                              |          |
| Theta range for data collection   | 1.670 to 28.581°.                                                  |          |
| Index ranges                      | -25 ≤ h ≤ 25, -16 ≤ k ≤ 16, -12 ≤ l ≤ 12                           |          |
| Reflections collected             | 20760                                                              |          |
| Independent reflections           | 5450 [R(int) = 0.0595]                                             |          |
| Completeness to theta = 25.000°   | 100.0 %                                                            |          |
| Refinement method                 | Full-matrix least-squares on F <sup>2</sup>                        |          |
| Data / restraints / parameters    | 5450 / 1 / 225                                                     |          |
| Goodness-of-fit on F <sup>2</sup> | 1.037                                                              |          |
| Final R indices [I > 2σ(I)]       | R1 = 0.0278, wR2 = 0.0541                                          |          |
| R indices (all data)              | R1 = 0.0365, wR2 = 0.0574                                          |          |
| Absolute structure parameter      | -0.010(6)                                                          |          |
| Largest diff. peak and hole       | 0.239 and -0.427 e.Å <sup>-3</sup>                                 |          |

**Table S6.** Atomic coordinates ( $\times 10^4$ ) and equivalent isotropic displacement parameters ( $\text{\AA}^2 \times 10^3$ ) for  $[\text{Fe}^{\text{II}}(\text{S}_2^{\text{Me}_2}\text{N}_3(\text{Pr},\text{Pr}))\cdots\text{H-OMe}(\mathbf{1}\cdots\text{H-OMe})]$ .  $U(\text{eq})$  is defined as one third of the trace of the orthogonalized  $U_{ij}$  tensor.

|       | x       | y       | z       | $U(\text{eq})$ |
|-------|---------|---------|---------|----------------|
| Fe(1) | 3775(1) | 3022(1) | 4521(1) | 12(1)          |
| S(1)  | 4763(1) | 2529(1) | 5843(1) | 18(1)          |
| S(2)  | 2810(1) | 3791(1) | 5604(1) | 16(1)          |
| C(3)  | 5131(2) | 429(2)  | 6602(3) | 25(1)          |
| C(2)  | 4162(2) | 1310(3) | 8013(3) | 23(1)          |
| C(16) | 2605(2) | 5953(2) | 6249(3) | 24(1)          |
| N(2)  | 3653(1) | 2996(2) | 2174(2) | 13(1)          |
| N(3)  | 4030(1) | 4726(2) | 4216(2) | 14(1)          |
| C(8)  | 3414(2) | 1944(2) | 1551(3) | 16(1)          |
| C(7)  | 2831(1) | 1469(2) | 2473(3) | 18(1)          |
| C(6)  | 3084(1) | 713(2)  | 3670(3) | 17(1)          |
| C(4)  | 3944(2) | 662(2)  | 5511(3) | 17(1)          |
| C(5)  | 3805(2) | -543(2) | 5702(3) | 27(1)          |
| C(1)  | 4492(2) | 1172(2) | 6492(3) | 17(1)          |
| C(9)  | 4239(2) | 3450(2) | 1316(3) | 19(1)          |
| C(10) | 4362(2) | 4657(2) | 1610(3) | 20(1)          |
| C(11) | 4584(1) | 4942(2) | 3157(3) | 19(1)          |
| C(12) | 3732(1) | 5469(2) | 4970(3) | 15(1)          |
| C(13) | 3892(2) | 6679(2) | 4895(3) | 26(1)          |
| C(14) | 3191(1) | 5119(2) | 6101(3) | 15(1)          |
| C(15) | 3567(2) | 5006(2) | 7583(3) | 20(1)          |
| C(18) | 6536(2) | 1817(3) | 4486(6) | 58(1)          |
| O(1)  | 5954(2) | 2000(2) | 3601(3) | 49(1)          |
| N(1)  | 3612(1) | 1253(2) | 4584(3) | 14(1)          |

**Table S7.** Bond lengths [ $\text{\AA}$ ] and angles [ $^\circ$ ] for  $[\text{Fe}^{\text{II}}(\text{S}_2^{\text{Me}_2}\text{N}_3(\text{Pr},\text{Pr}))\cdots\text{H}-\text{OMe} (\mathbf{1}\cdots\text{H}-\text{OMe})$ .

---

|              |            |
|--------------|------------|
| Fe(1)-N(3)   | 2.153(2)   |
| Fe(1)-N(2)   | 2.154(2)   |
| Fe(1)-N(1)   | 2.1802(19) |
| Fe(1)-S(2)   | 2.3103(7)  |
| Fe(1)-S(1)   | 2.3372(8)  |
| S(1)-C(1)    | 1.833(3)   |
| S(2)-C(14)   | 1.837(3)   |
| C(3)-C(1)    | 1.534(4)   |
| C(3)-H(3A)   | 0.9800     |
| C(3)-H(3B)   | 0.9800     |
| C(3)-H(3C)   | 0.9800     |
| C(2)-C(1)    | 1.536(4)   |
| C(2)-H(2A)   | 0.9800     |
| C(2)-H(2B)   | 0.9800     |
| C(2)-H(2C)   | 0.9800     |
| C(16)-C(14)  | 1.529(4)   |
| C(16)-H(16A) | 0.9800     |
| C(16)-H(16B) | 0.9800     |
| C(16)-H(16C) | 0.9800     |
| N(2)-C(8)    | 1.477(3)   |
| N(2)-C(9)    | 1.483(3)   |
| N(2)-H(2)    | 1.0000     |
| N(3)-C(12)   | 1.275(3)   |
| N(3)-C(11)   | 1.466(3)   |
| C(8)-C(7)    | 1.522(4)   |
| C(8)-H(8A)   | 0.9900     |
| C(8)-H(8B)   | 0.9900     |
| C(7)-C(6)    | 1.510(4)   |
| C(7)-H(7A)   | 0.9900     |
| C(7)-H(7B)   | 0.9900     |
| C(6)-N(1)    | 1.473(3)   |
| C(6)-H(6A)   | 0.9900     |
| C(6)-H(6B)   | 0.9900     |
| C(4)-N(1)    | 1.283(3)   |

|                 |           |
|-----------------|-----------|
| C(4)-C(5)       | 1.503(4)  |
| C(4)-C(1)       | 1.520(4)  |
| C(5)-H(5A)      | 0.9800    |
| C(5)-H(5B)      | 0.9800    |
| C(5)-H(5C)      | 0.9800    |
| C(9)-C(10)      | 1.515(4)  |
| C(9)-H(9A)      | 0.9900    |
| C(9)-H(9B)      | 0.9900    |
| C(10)-C(11)     | 1.515(4)  |
| C(10)-H(10A)    | 0.9900    |
| C(10)-H(10B)    | 0.9900    |
| C(11)-H(11A)    | 0.9900    |
| C(11)-H(11B)    | 0.9900    |
| C(12)-C(13)     | 1.508(4)  |
| C(12)-C(14)     | 1.530(4)  |
| C(13)-H(13A)    | 0.9800    |
| C(13)-H(13B)    | 0.9800    |
| C(13)-H(13C)    | 0.9800    |
| C(14)-C(15)     | 1.541(4)  |
| C(15)-H(15A)    | 0.9800    |
| C(15)-H(15B)    | 0.9800    |
| C(15)-H(15C)    | 0.9800    |
| C(18)-O(1)      | 1.401(5)  |
| C(18)-H(18A)    | 0.9800    |
| C(18)-H(18B)    | 0.9800    |
| C(18)-H(18C)    | 0.9800    |
| O(1)-H(1)       | 0.8400    |
|                 |           |
| N(3)-Fe(1)-N(2) | 84.87(8)  |
| N(3)-Fe(1)-N(1) | 172.24(8) |
| N(2)-Fe(1)-N(1) | 89.77(8)  |
| N(3)-Fe(1)-S(2) | 81.33(6)  |
| N(2)-Fe(1)-S(2) | 110.05(6) |
| N(1)-Fe(1)-S(2) | 105.83(6) |
| N(3)-Fe(1)-S(1) | 97.32(6)  |
| N(2)-Fe(1)-S(1) | 126.76(6) |

|                     |            |
|---------------------|------------|
| N(1)-Fe(1)-S(1)     | 81.40(6)   |
| S(2)-Fe(1)-S(1)     | 122.93(3)  |
| C(1)-S(1)-Fe(1)     | 99.51(9)   |
| C(14)-S(2)-Fe(1)    | 97.95(9)   |
| C(1)-C(3)-H(3A)     | 109.5      |
| C(1)-C(3)-H(3B)     | 109.5      |
| H(3A)-C(3)-H(3B)    | 109.5      |
| C(1)-C(3)-H(3C)     | 109.5      |
| H(3A)-C(3)-H(3C)    | 109.5      |
| H(3B)-C(3)-H(3C)    | 109.5      |
| C(1)-C(2)-H(2A)     | 109.5      |
| C(1)-C(2)-H(2B)     | 109.5      |
| H(2A)-C(2)-H(2B)    | 109.5      |
| C(1)-C(2)-H(2C)     | 109.5      |
| H(2A)-C(2)-H(2C)    | 109.5      |
| H(2B)-C(2)-H(2C)    | 109.5      |
| C(14)-C(16)-H(16A)  | 109.5      |
| C(14)-C(16)-H(16B)  | 109.5      |
| H(16A)-C(16)-H(16B) | 109.5      |
| C(14)-C(16)-H(16C)  | 109.5      |
| H(16A)-C(16)-H(16C) | 109.5      |
| H(16B)-C(16)-H(16C) | 109.5      |
| C(8)-N(2)-C(9)      | 111.1(2)   |
| C(8)-N(2)-Fe(1)     | 115.43(16) |
| C(9)-N(2)-Fe(1)     | 115.86(16) |
| C(8)-N(2)-H(2)      | 104.3      |
| C(9)-N(2)-H(2)      | 104.3      |
| Fe(1)-N(2)-H(2)     | 104.3      |
| C(12)-N(3)-C(11)    | 123.8(2)   |
| C(12)-N(3)-Fe(1)    | 120.83(18) |
| C(11)-N(3)-Fe(1)    | 115.25(17) |
| N(2)-C(8)-C(7)      | 110.5(2)   |
| N(2)-C(8)-H(8A)     | 109.6      |
| C(7)-C(8)-H(8A)     | 109.6      |
| N(2)-C(8)-H(8B)     | 109.6      |
| C(7)-C(8)-H(8B)     | 109.6      |

|                   |            |
|-------------------|------------|
| H(8A)-C(8)-H(8B)  | 108.1      |
| C(6)-C(7)-C(8)    | 113.0(2)   |
| C(6)-C(7)-H(7A)   | 109.0      |
| C(8)-C(7)-H(7A)   | 109.0      |
| C(6)-C(7)-H(7B)   | 109.0      |
| C(8)-C(7)-H(7B)   | 109.0      |
| H(7A)-C(7)-H(7B)  | 107.8      |
| N(1)-C(6)-C(7)    | 111.2(2)   |
| N(1)-C(6)-H(6A)   | 109.4      |
| C(7)-C(6)-H(6A)   | 109.4      |
| N(1)-C(6)-H(6B)   | 109.4      |
| C(7)-C(6)-H(6B)   | 109.4      |
| H(6A)-C(6)-H(6B)  | 108.0      |
| N(1)-C(4)-C(5)    | 122.4(2)   |
| N(1)-C(4)-C(1)    | 120.4(2)   |
| C(5)-C(4)-C(1)    | 117.2(2)   |
| C(4)-C(5)-H(5A)   | 109.5      |
| C(4)-C(5)-H(5B)   | 109.5      |
| H(5A)-C(5)-H(5B)  | 109.5      |
| C(4)-C(5)-H(5C)   | 109.5      |
| H(5A)-C(5)-H(5C)  | 109.5      |
| H(5B)-C(5)-H(5C)  | 109.5      |
| C(4)-C(1)-C(3)    | 110.9(2)   |
| C(4)-C(1)-C(2)    | 106.7(2)   |
| C(3)-C(1)-C(2)    | 109.8(2)   |
| C(4)-C(1)-S(1)    | 112.23(18) |
| C(3)-C(1)-S(1)    | 108.9(2)   |
| C(2)-C(1)-S(1)    | 108.17(19) |
| N(2)-C(9)-C(10)   | 112.9(2)   |
| N(2)-C(9)-H(9A)   | 109.0      |
| C(10)-C(9)-H(9A)  | 109.0      |
| N(2)-C(9)-H(9B)   | 109.0      |
| C(10)-C(9)-H(9B)  | 109.0      |
| H(9A)-C(9)-H(9B)  | 107.8      |
| C(9)-C(10)-C(11)  | 115.6(2)   |
| C(9)-C(10)-H(10A) | 108.4      |

|                     |            |
|---------------------|------------|
| C(11)-C(10)-H(10A)  | 108.4      |
| C(9)-C(10)-H(10B)   | 108.4      |
| C(11)-C(10)-H(10B)  | 108.4      |
| H(10A)-C(10)-H(10B) | 107.4      |
| N(3)-C(11)-C(10)    | 111.5(2)   |
| N(3)-C(11)-H(11A)   | 109.3      |
| C(10)-C(11)-H(11A)  | 109.3      |
| N(3)-C(11)-H(11B)   | 109.3      |
| C(10)-C(11)-H(11B)  | 109.3      |
| H(11A)-C(11)-H(11B) | 108.0      |
| N(3)-C(12)-C(13)    | 125.3(2)   |
| N(3)-C(12)-C(14)    | 118.3(2)   |
| C(13)-C(12)-C(14)   | 116.3(2)   |
| C(12)-C(13)-H(13A)  | 109.5      |
| C(12)-C(13)-H(13B)  | 109.5      |
| H(13A)-C(13)-H(13B) | 109.5      |
| C(12)-C(13)-H(13C)  | 109.5      |
| H(13A)-C(13)-H(13C) | 109.5      |
| H(13B)-C(13)-H(13C) | 109.5      |
| C(16)-C(14)-C(12)   | 112.4(2)   |
| C(16)-C(14)-C(15)   | 109.4(2)   |
| C(12)-C(14)-C(15)   | 107.1(2)   |
| C(16)-C(14)-S(2)    | 108.03(19) |
| C(12)-C(14)-S(2)    | 110.74(18) |
| C(15)-C(14)-S(2)    | 109.10(18) |
| C(14)-C(15)-H(15A)  | 109.5      |
| C(14)-C(15)-H(15B)  | 109.5      |
| H(15A)-C(15)-H(15B) | 109.5      |
| C(14)-C(15)-H(15C)  | 109.5      |
| H(15A)-C(15)-H(15C) | 109.5      |
| H(15B)-C(15)-H(15C) | 109.5      |
| O(1)-C(18)-H(18A)   | 109.5      |
| O(1)-C(18)-H(18B)   | 109.5      |
| H(18A)-C(18)-H(18B) | 109.5      |
| O(1)-C(18)-H(18C)   | 109.5      |
| H(18A)-C(18)-H(18C) | 109.5      |



|                     |            |
|---------------------|------------|
| H(18B)-C(18)-H(18C) | 109.5      |
| C(18)-O(1)-H(1)     | 109.5      |
| C(4)-N(1)-C(6)      | 117.9(2)   |
| C(4)-N(1)-Fe(1)     | 120.06(18) |
| C(6)-N(1)-Fe(1)     | 121.85(16) |

---

\*Symmetry transformations used to generate equivalent atoms.

**Table S8.** Anisotropic displacement parameters ( $\text{\AA}^2 \times 10^3$ ) for  $[\text{Fe}^{\text{II}}(\text{S}_2^{\text{Me}_2}\text{N}_3(\text{Pr},\text{Pr}))\cdots\text{H-OMe}(\mathbf{1}\cdots\text{H-OMe})]$ . The anisotropic displacement factor exponent takes the form:  $-2\pi^2 [ h^2 a^* 2U^{11} + \dots + 2 h k a^* b^* U^{12} ]$

|       | $U^{11}$ | $U^{22}$ | $U^{33}$ | $U^{23}$ | $U^{13}$ | $U^{12}$ |
|-------|----------|----------|----------|----------|----------|----------|
| Fe(1) | 12(1)    | 12(1)    | 11(1)    | 0(1)     | 0(1)     | 0(1)     |
| S(1)  | 16(1)    | 17(1)    | 21(1)    | 0(1)     | -5(1)    | 1(1)     |
| S(2)  | 13(1)    | 16(1)    | 18(1)    | -3(1)    | 4(1)     | -3(1)    |
| C(3)  | 23(2)    | 24(2)    | 26(2)    | 3(1)     | 0(1)     | 7(1)     |
| C(2)  | 24(2)    | 28(2)    | 16(1)    | 0(1)     | -1(1)    | 2(1)     |
| C(16) | 16(2)    | 20(2)    | 35(2)    | -10(1)   | -1(1)    | 4(1)     |
| N(2)  | 12(1)    | 16(1)    | 12(1)    | 0(1)     | 0(1)     | 2(1)     |
| N(3)  | 12(1)    | 17(1)    | 13(1)    | 2(1)     | 1(1)     | -2(1)    |
| C(8)  | 18(2)    | 18(1)    | 14(1)    | -3(1)    | -1(1)    | 1(1)     |
| C(7)  | 18(2)    | 19(1)    | 16(1)    | -3(1)    | -4(1)    | 0(1)     |
| C(6)  | 19(2)    | 15(1)    | 18(1)    | -2(1)    | -1(1)    | -4(1)    |
| C(4)  | 21(1)    | 15(1)    | 14(1)    | -1(1)    | 3(1)     | 2(1)     |
| C(5)  | 41(2)    | 15(1)    | 24(2)    | 5(1)     | -6(1)    | 0(1)     |
| C(1)  | 19(2)    | 16(1)    | 16(1)    | 1(1)     | 1(1)     | 5(1)     |
| C(9)  | 18(2)    | 25(2)    | 16(1)    | 0(1)     | 5(1)     | -1(1)    |
| C(10) | 19(2)    | 24(2)    | 16(1)    | 5(1)     | 5(1)     | -4(1)    |
| C(11) | 16(2)    | 22(2)    | 19(1)    | 2(1)     | 4(1)     | -5(1)    |
| C(12) | 13(1)    | 13(1)    | 18(1)    | 1(1)     | -3(1)    | -2(1)    |
| C(13) | 29(2)    | 15(1)    | 36(2)    | 0(1)     | 3(1)     | -3(1)    |
| C(14) | 14(1)    | 14(1)    | 19(1)    | -2(1)    | 0(1)     | 0(1)     |
| C(15) | 19(2)    | 23(2)    | 17(1)    | -3(1)    | 0(1)     | -2(1)    |
| C(18) | 43(2)    | 59(3)    | 72(2)    | -23(3)   | 22(3)    | -25(2)   |
| O(1)  | 60(2)    | 49(2)    | 39(2)    | -13(1)   | 24(1)    | -4(1)    |
| N(1)  | 16(1)    | 14(1)    | 13(1)    | 0(1)     | 1(1)     | -1(1)    |

**Table S9.** Hydrogen coordinates ( $\times 10^4$ ) and isotropic displacement parameters ( $\text{\AA}^2 \times 10^3$ ) for  $[\text{Fe}^{\text{II}}(\text{S}_2^{\text{Me}_2}\text{N}_3(\text{Pr},\text{Pr}))\cdots\text{H}-\text{OMe}(\mathbf{1}\cdots\text{H}-\text{OMe})]$ .

|        | x    | y    | z    | U(eq) |
|--------|------|------|------|-------|
| H(3A)  | 5003 | -259 | 7088 | 37    |
| H(3B)  | 5491 | 800  | 7173 | 37    |
| H(3C)  | 5305 | 271  | 5616 | 37    |
| H(2A)  | 3783 | 1841 | 7955 | 34    |
| H(2B)  | 4512 | 1574 | 8707 | 34    |
| H(2C)  | 3982 | 601  | 8349 | 34    |
| H(16A) | 2792 | 6655 | 6589 | 35    |
| H(16B) | 2264 | 5683 | 6959 | 35    |
| H(16C) | 2381 | 6055 | 5295 | 35    |
| H(2)   | 3263 | 3516 | 1983 | 16    |
| H(8A)  | 3804 | 1419 | 1519 | 20    |
| H(8B)  | 3250 | 2062 | 536  | 20    |
| H(7A)  | 2567 | 2078 | 2924 | 21    |
| H(7B)  | 2511 | 1058 | 1826 | 21    |
| H(6A)  | 2689 | 489  | 4292 | 21    |
| H(6B)  | 3284 | 43   | 3224 | 21    |
| H(5A)  | 3304 | -673 | 5676 | 40    |
| H(5B)  | 3990 | -787 | 6647 | 40    |
| H(5C)  | 4028 | -953 | 4908 | 40    |
| H(9A)  | 4144 | 3346 | 259  | 23    |
| H(9B)  | 4664 | 3035 | 1558 | 23    |
| H(10A) | 3931 | 5062 | 1386 | 24    |
| H(10B) | 4723 | 4921 | 924  | 24    |
| H(11A) | 4997 | 4505 | 3421 | 23    |
| H(11B) | 4713 | 5728 | 3201 | 23    |
| H(13A) | 4328 | 6790 | 4367 | 40    |
| H(13B) | 3934 | 6973 | 5890 | 40    |
| H(13C) | 3518 | 7059 | 4379 | 40    |
| H(15A) | 3765 | 5716 | 7862 | 29    |
| H(15B) | 3938 | 4462 | 7495 | 29    |

|        |      |      |      |    |
|--------|------|------|------|----|
| H(15C) | 3237 | 4769 | 8334 | 29 |
| H(18A) | 6519 | 2305 | 5339 | 87 |
| H(18B) | 6957 | 1968 | 3921 | 87 |
| H(18C) | 6540 | 1052 | 4815 | 87 |
| H(1)   | 5603 | 2078 | 4134 | 74 |

---

**Table S10.** DFT optimized bond lengths (using the B3LYP functional and def2-TZVP basis set) versus experimental distances for  $[\text{Fe}^{\text{II}}(\text{S}_2^{\text{Me}_2}\text{N}_3(\text{Pr},\text{Pr}))\cdots\text{H}-\text{OMe}$  (**1** $\cdots\text{H}-\text{OMe}$ ) containing a MeOH solvent molecule H-bonded to one of the thiolate sulfurs, S(2).

| Bond                  | Calcd Bond Length (Å) | Exptl Bond Length (Å) |
|-----------------------|-----------------------|-----------------------|
| Fe-S(1)               | 2.338                 | 2.3103(7)             |
| Fe-S(2)               | 2.356                 | 2.3372(8)             |
| Fe-N(1)               | 2.194                 | 2.1802(19)            |
| Fe-N(2)               | 2.165                 | 2.154(2)              |
| Fe-N(3)               | 2.185                 | 2.153(2)              |
| S(2) $\cdots\text{H}$ | 2.224                 | 2.318                 |
| O(1)-H                | 0.985                 | 0.840                 |
| $\tau$                | 0.78                  | 0.76                  |

**Table S11.** DFT optimized bond lengths (using the B3LYP functional and def2-TZVP basis set) versus experimental distances for  $[\text{Fe}^{\text{II}}(\text{S}_2^{\text{Me}_2}\text{N}_3(\text{Pr},\text{Pr}))]$  (**1**).

| Bond    | Calcd Bond Length (Å) | Exptl Bond Length (Å) |
|---------|-----------------------|-----------------------|
| Fe-S(1) | 2.338                 | 2.3263(5)             |
| Fe-S(2) | 2.336                 | 2.3306(5)             |
| Fe-N(1) | 2.184                 | 2.1556(16)            |
| Fe-N(2) | 2.203                 | 2.1656(16)            |
| Fe-N(3) | 2.174                 | 2.1815(15)            |
| $\tau$  | 0.79                  | 0.79                  |

**Table S12.** DFT optimized bond lengths (using the B3LYP functional and def2-TZVP basis set) for  $[\text{Fe}^{\text{III}}(\text{S}_2^{\text{Me}_2}\text{N}_3(\text{Pr},\text{Pr})(\text{O}_2))]$  (**2**) in MeOH.

| Bond      | Calcd Bond Length (Å) |
|-----------|-----------------------|
| Fe-S(1)   | 2.241                 |
| Fe-S(2)   | 2.266                 |
| Fe-N(1)   | 1.999                 |
| Fe-N(2)   | 2.118                 |
| Fe-N(3)   | 1.996                 |
| Fe-O(1)   | 1.973                 |
| O(1)-O(2) | 1.310                 |

**Table S13.** DFT optimized coordinates (using the B3LYP functional and def2-TZVP basis set) for  $[\text{Fe}^{\text{II}}(\text{S}_2^{\text{Me}_2}\text{N}_3(\text{Pr},\text{Pr}))\cdots\text{H}-\text{OMe} (\mathbf{1}\cdots\text{H}-\text{OMe})$  in MeOH

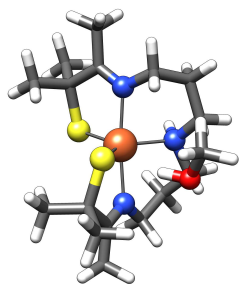

|    |              |              |              |
|----|--------------|--------------|--------------|
| Fe | 0.187840000  | 0.031874000  | 2.207628000  |
| S  | 2.516433000  | 0.158277000  | 2.542709000  |
| S  | -1.087148000 | 1.968776000  | 1.908785000  |
| N  | 0.218245000  | -0.269054000 | 4.372063000  |
| N  | 0.206799000  | 0.078130000  | 0.042963000  |
| N  | -1.000941000 | -1.793120000 | 1.941660000  |
| O  | 2.537274000  | -3.021609000 | 2.951929000  |
| H  | 2.470473000  | -2.044771000 | 2.848378000  |
| C  | 3.382440000  | -3.497198000 | 1.912449000  |
| C  | -1.458421000 | -2.393969000 | 3.211330000  |
| C  | 0.067044000  | 1.266016000  | -2.096312000 |
| C  | 2.518161000  | 0.562024000  | 4.350048000  |
| C  | -0.409893000 | -2.797316000 | 1.031673000  |
| C  | 3.742861000  | -0.114823000 | 4.988821000  |
| C  | -0.259649000 | -2.294192000 | -0.398245000 |
| C  | 0.711017000  | -1.128021000 | -0.601647000 |
| C  | -0.107098000 | 1.131375000  | -0.602170000 |
| H  | -2.314984000 | 3.715220000  | 0.016495000  |
| H  | -2.683419000 | 2.101621000  | -0.601732000 |
| H  | -1.710854000 | 3.226931000  | -1.566366000 |
| H  | -1.425665000 | 0.120974000  | 5.626442000  |
| H  | -2.504589000 | -0.548820000 | 3.557839000  |
| H  | 0.081005000  | 4.324113000  | 0.639446000  |
| H  | -2.799208000 | -1.773363000 | 4.775403000  |
| H  | 0.305437000  | 0.604831000  | 6.912920000  |
| H  | 1.772279000  | 2.583192000  | 4.033897000  |
| H  | -0.697003000 | -1.466463000 | 5.829725000  |
| H  | 0.716525000  | 3.712487000  | -0.893226000 |
| H  | 2.636691000  | 2.375830000  | 5.569669000  |
| H  | 1.338761000  | 3.079669000  | 0.643204000  |
| H  | 2.070031000  | 0.688456000  | 6.957514000  |
| H  | -1.821357000 | -1.403575000 | 1.480762000  |
| H  | -0.675368000 | 0.656593000  | -2.617278000 |
| H  | -2.212233000 | -3.158952000 | 2.998669000  |
| H  | 1.253899000  | -0.875223000 | 6.947679000  |
| H  | -0.052192000 | 2.292777000  | -2.426167000 |
| H  | 3.537154000  | 2.446021000  | 4.049530000  |
| H  | -0.603739000 | -2.897794000 | 3.667538000  |
| H  | -1.241104000 | -2.012344000 | -0.793346000 |
| H  | 1.053582000  | 0.921820000  | -2.405648000 |

|   |              |              |              |
|---|--------------|--------------|--------------|
| H | 3.875139000  | 0.176652000  | 6.031987000  |
| H | -1.043927000 | -3.691968000 | 1.021694000  |
| H | 0.885828000  | -0.997917000 | -1.669493000 |
| H | 0.557774000  | -3.086203000 | 1.444010000  |
| H | 4.637113000  | 0.183937000  | 4.442100000  |
| H | 3.658076000  | -1.200769000 | 4.937644000  |
| H | 1.669173000  | -1.370957000 | -0.134165000 |
| H | 0.094287000  | -3.131944000 | -1.003552000 |
| C | 1.239191000  | 0.102947000  | 5.045455000  |
| H | 2.950831000  | -3.313503000 | 0.921927000  |
| H | 4.372631000  | -3.030736000 | 1.949640000  |
| H | 3.499975000  | -4.573265000 | 2.043241000  |
| C | -0.981308000 | -0.718954000 | 5.083156000  |
| C | 1.224795000  | 0.143659000  | 6.550458000  |
| C | 0.445014000  | 3.432735000  | 0.128148000  |
| C | -2.021127000 | -1.329622000 | 4.151331000  |
| C | -0.651344000 | 2.350094000  | 0.144792000  |
| C | -1.916522000 | 2.875921000  | -0.553424000 |
| C | 2.617569000  | 2.090501000  | 4.514826000  |

**Table S14.** DFT optimized coordinates (using the B3LYP functional and def2-TZVP basis set) for  $[\text{Fe}^{\text{II}}(\text{S}_2^{\text{Me}_2}\text{N}_3(\text{Pr},\text{Pr}))]$  (**1**)

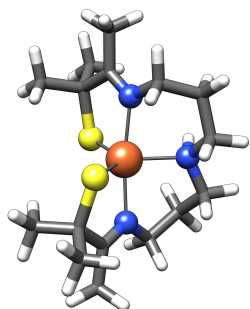

|    |              |              |              |
|----|--------------|--------------|--------------|
| Fe | 0.151055000  | -0.153370000 | -0.036351000 |
| S  | 2.477303000  | -0.250168000 | -0.247789000 |
| S  | -1.247675000 | -1.997855000 | 0.278330000  |
| N  | 0.269386000  | 0.057142000  | -2.206808000 |
| N  | -0.928519000 | 1.763793000  | 0.070718000  |
| N  | 0.016241000  | -0.069024000 | 2.132000000  |
| C  | 2.568112000  | -0.747811000 | -2.028832000 |
| C  | 1.322739000  | -0.339939000 | -2.811064000 |
| C  | -1.028758000 | -2.264901000 | 2.101089000  |
| C  | -0.433209000 | -1.049130000 | 2.811087000  |
| C  | -1.306898000 | 2.304878000  | -1.249418000 |
| C  | -1.921562000 | 1.215370000  | -2.127842000 |
| C  | -0.897945000 | 0.475340000  | -2.984013000 |
| C  | -0.252421000 | 2.761692000  | 0.923418000  |
| C  | -0.231228000 | 2.365651000  | 2.394932000  |
| C  | 0.589982000  | 1.121986000  | 2.745249000  |
| C  | 1.379951000  | -0.457950000 | -4.312116000 |
| C  | -0.374488000 | -1.097541000 | 4.320683000  |
| H  | -1.786078000 | 1.479348000  | 0.539604000  |
| H  | -2.006129000 | 3.137244000  | -1.116387000 |
| H  | -0.404878000 | 2.709552000  | -1.713902000 |
| H  | -2.463002000 | 0.510480000  | -1.491398000 |
| H  | -2.657319000 | 1.660370000  | -2.800446000 |
| H  | 0.471149000  | -0.922202000 | -4.696208000 |
| H  | -0.578503000 | 1.135086000  | -3.796011000 |
| H  | 0.765694000  | 2.886930000  | 0.546971000  |
| H  | -0.759661000 | 3.729426000  | 0.828449000  |
| H  | 0.182384000  | 3.206604000  | 2.956476000  |
| H  | -1.258579000 | 2.226426000  | 2.747786000  |
| H  | 0.667812000  | 1.048144000  | 3.830167000  |
| H  | 1.601133000  | 1.235294000  | 2.344946000  |
| H  | -1.367235000 | -0.398653000 | -3.447039000 |
| H  | 2.233819000  | -1.038332000 | -4.646162000 |
| H  | 1.451765000  | 0.537169000  | -4.760971000 |
| H  | 0.634024000  | -0.881032000 | 4.673977000  |
| H  | -0.666809000 | -2.068104000 | 4.707096000  |
| H  | -1.043417000 | -0.347712000 | 4.749274000  |
| C  | 2.690446000  | -2.281797000 | -2.113409000 |
| H  | 4.686319000  | -0.355270000 | -2.048674000 |



|   |              |              |              |
|---|--------------|--------------|--------------|
| C | -0.063159000 | -3.446644000 | 2.314498000  |
| C | -2.405733000 | -2.598468000 | 2.700653000  |
| H | 0.911188000  | -3.226919000 | 1.877278000  |
| H | 0.071283000  | -3.671117000 | 3.375967000  |
| H | -0.466931000 | -4.334254000 | 1.827358000  |
| H | -2.833516000 | -3.442679000 | 2.160180000  |
| H | -2.341056000 | -2.873266000 | 3.755383000  |
| H | -3.086418000 | -1.751708000 | 2.601763000  |
| H | 1.824992000  | -2.759595000 | -1.653823000 |
| C | 3.814067000  | -0.089487000 | -2.645613000 |
| H | 2.769948000  | -2.620712000 | -3.150061000 |
| H | 3.994014000  | -0.423263000 | -3.669356000 |
| H | 3.719258000  | 0.997255000  | -2.643714000 |
| H | 3.585638000  | -2.602131000 | -1.580285000 |

**Table S15.** DFT optimized coordinates (using the B3LYP functional and def2-TZVP basis set) for  $[\text{Fe}^{\text{III}}(\text{S}_2^{\text{Me}_2}\text{N}_3(\text{Pr},\text{Pr})(\text{O}_2))] \text{ (2)}$  in MeOH

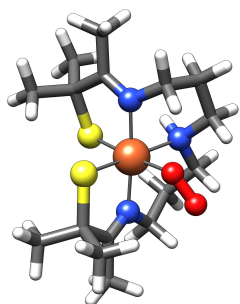

|    |              |              |              |
|----|--------------|--------------|--------------|
| Fe | 0.070175000  | -0.233500000 | 0.011578000  |
| S  | 2.292906000  | -0.517674000 | -0.018409000 |
| S  | -0.449790000 | -2.407961000 | 0.382216000  |
| N  | 0.135832000  | -0.490511000 | -1.969385000 |
| N  | -1.957531000 | 0.348280000  | 0.196171000  |
| N  | 0.074661000  | -0.129327000 | 2.004716000  |
| O  | 0.423965000  | 1.693274000  | -0.225298000 |
| O  | 0.040972000  | 2.280132000  | -1.331942000 |
| C  | 2.575821000  | -0.501265000 | -1.839479000 |
| C  | 1.258572000  | -0.543855000 | -2.586763000 |
| C  | 0.050558000  | -2.548595000 | 2.155468000  |
| C  | 0.110917000  | -1.160264000 | 2.764134000  |
| C  | -2.694983000 | 0.452799000  | -1.077509000 |
| C  | -2.385408000 | -0.700666000 | -2.014831000 |
| C  | -1.086798000 | -0.548183000 | -2.787931000 |
| C  | -2.212466000 | 1.551055000  | 1.026887000  |
| C  | -1.673053000 | 1.473994000  | 2.449417000  |
| C  | -0.170081000 | 1.199792000  | 2.563334000  |
| C  | 1.332525000  | -0.628989000 | -4.086691000 |
| C  | 0.170415000  | -1.070641000 | 4.265610000  |
| H  | -2.309651000 | -0.468746000 | 0.691134000  |
| H  | -3.767867000 | 0.490946000  | -0.863137000 |
| H  | -2.414395000 | 1.399167000  | -1.541466000 |
| H  | -2.402536000 | -1.644329000 | -1.465902000 |
| H  | -3.181769000 | -0.757172000 | -2.760614000 |
| H  | -1.138645000 | 0.369118000  | -3.381620000 |
| H  | -1.004277000 | -1.380037000 | -3.489884000 |
| H  | -1.776991000 | 2.400236000  | 0.505117000  |
| H  | -3.294487000 | 1.713908000  | 1.073684000  |
| H  | -1.892126000 | 2.428470000  | 2.933628000  |
| H  | -2.210738000 | 0.702060000  | 3.007945000  |
| H  | 0.136582000  | 1.272178000  | 3.604324000  |
| H  | 0.395541000  | 1.926528000  | 1.986057000  |
| H  | 0.903998000  | -1.571500000 | -4.436135000 |
| H  | 2.354250000  | -0.567632000 | -4.445349000 |
| H  | 0.754751000  | 0.176709000  | -4.543585000 |
| H  | 0.880396000  | -0.310620000 | 4.588255000  |
| H  | 0.466201000  | -2.021550000 | 4.698588000  |
| H  | -0.809582000 | -0.808184000 | 4.671969000  |
| C  | 3.417715000  | -1.737443000 | -2.204058000 |

|   |              |              |              |
|---|--------------|--------------|--------------|
| C | 3.334217000  | 0.783135000  | -2.224960000 |
| C | 1.414456000  | -3.245734000 | 2.284161000  |
| C | -1.023372000 | -3.383370000 | 2.876879000  |
| H | 2.176705000  | -2.702423000 | 1.729328000  |
| H | 1.718583000  | -3.318269000 | 3.331704000  |
| H | 1.340323000  | -4.257055000 | 1.882425000  |
| H | -1.151241000 | -4.325533000 | 2.343126000  |
| H | -0.734413000 | -3.616256000 | 3.903350000  |
| H | -1.982428000 | -2.864422000 | 2.888685000  |
| H | 2.874527000  | -2.655404000 | -1.977468000 |
| H | 4.335459000  | -1.727824000 | -1.615154000 |
| H | 3.695558000  | -1.743015000 | -3.259871000 |
| H | 3.572045000  | 0.803138000  | -3.290967000 |
| H | 2.745451000  | 1.665750000  | -1.978736000 |
| H | 4.271337000  | 0.824032000  | -1.669282000 |

## Reference

1. M. N. Blakely, M. A. Dedushko, P. C. Y. Poon, G. Villar-Acevedo and J. A. Kovacs, Formation of a Reactive, Alkyl Thiolate-Ligated FeIII-Superoxo Intermediate Derived from Dioxide, *J. Am. Chem. Soc.*, 2019, **141**, 1867-1870.
2. J. J. N. Ellison, A.; Shoner, S. C.; Barnhart, D.; Cowen, J. A., Kovacs, J. A., Reactivity of Five-Coordinate Models for the Thiolate-Ligated Fe Site of Nitrile Hydratase, *J. Am. Chem. Soc.*, 1998, **120**, 5691-5700.
3. F. E. Grubbs, Procedures for Detecting Outlying Observations in Samples, *Technometrics*, 1969, **11**, 1-21.
4. Kinetic Studio,(5.1.0.6), TgK Scientific, Salisbury, UK,2018.
5. S. V. Kryatov, E. V. Rybak-Akimova and S. Schindler, Kinetics and Mechanisms of Formation and Reactivity of Non-heme Iron Oxygen Intermediates, *Chemical reviews*, 2005, **105**, 2175-2226.
6. F. Neese, The ORCA program system, *Comput. Molec. Sci.*, 2012, **2**, 73-78.
7. S. E. Grimme, S.; Goerigk, L., *J. Comput. Chem*, 2011, **32**, 1456-1465.
8. V. C. Barone, M., Quantum Calculation of Molecular Energies and Energy Gradients in Solution by a Conductor Solvent Model, *J. Phys. Chem.*, 1998, **102**, 1995 -2001.
9. C. B. Adamo, V., Toward reliable density functional methods without adjustable parameters: The PBE0 model, *J. Chem. Phys.*, 1999, **110**, 6158 – 6170.
10. F. W. Neese, F.; Hansen, A.; Becker, U., Efficient, approximate and parallel Hartree-Fock and hybrid DFT calculations. A 'chain-of-spheres' algorithm for the Hartree-Fock exchange, *Chem. Phys.*, 2009, **356**, 98–109.
11. S. H.-G. Hirata, M., Time-dependent density functional theory within the Tamm–Dancoff approximation, *Chem. Phys. Lett.*, 1999, **314**, 291–299.
12. F. O. Neese, G., Efficient use of the resolution of the identity approximation in time-dependent density functional calculations with hybrid density functionals, *Chem. Phys. Lett.*, 2002, **362**, 170–178.
13. E. F. G. Pettersen, T. D.; Huang, C. C.; Couch, G. S.; Greenblatt, D. M.; Meng, E. C.; Ferrin, T. E., UCSF Chimera- a visualization system for exploratory research and analysis, *J. Comput. Chem.*, 2004, **25**, 1605–1612.
14. S. V. A. Bruker. APEX2 (Version 2.1-4), SADABS (Version 2007/4). 2007.
15. G. Sheldrick, A short history of SHELX, *Acta Crystallographica Section A*, 2008, **64**, 112-122.
16. G. Sheldrick, Crystal structure refinement with SHELXL, *Acta Crystallographica Section C*, 2015, **71**, 3-8.
17. G. M. Sheldrick, SHELXL-97, Program for the Solution of Crystal Structures University of Göttingen, Germany,1997.
18. D. K. Waasmaier, A., *Acta Crystallogr. A.*, 1995, **51**, 416.
19. L. Farrugia, WinGX and ORTEP for Windows: an update, *Journal of Applied Crystallography*, 2012, **45**, 849-854.
20. D. S. BIOVIA, BIOVIA Discovery Studio Dassault Systèmes, San Diego,2020.
21. J. H. Espenson, *Chemical Kinetics and Reaction Mechanisms*, McGraw-Hill, New York, 1981.
